# Geometry of antiparallel microtubule bundles regulates relative sliding and stalling by PRC1 and Kif4A

Sithara S. Wijeratne<sup>1,2</sup> and Radhika Subramanian<sup>1,2,\*</sup>

<sup>1</sup>Department of Molecular Biology, Massachusetts General Hospital, Boston, MA 02114, USA

<sup>2</sup>Department of Genetics, Harvard Medical School, Boston, MA 02115, USA

\*Corresponding author:

Radhika Subramanian, Ph.D.

Department of Molecular Biology

Massachusetts General Hospital

185 Cambridge St.

Boston, MA 02114

Tel: 617-724-2481

Fax: 617-726-6893

[radhika@molbio.mgh.harvard.edu](mailto:radhika@molbio.mgh.harvard.edu)

## Abstract

Motor and non-motor crosslinking proteins play critical roles in determining the size and stability of microtubule-based architectures. Currently, we have a limited understanding of how geometrical properties of microtubule arrays, in turn, regulate the output of crosslinking proteins. Here we investigate this problem in the context of microtubule sliding by two interacting proteins: the non-motor crosslinker PRC1 and the kinesin Kif4A. The collective activity of PRC1 and Kif4A also results in their accumulation at microtubule plus-ends ('end-tag'). Sliding stalls when the end-tags on antiparallel microtubules collide, forming a stable overlap. Interestingly, we find that structural properties of the initial array regulate PRC1-Kif4A mediated microtubule organization. First, sliding velocity scales with initial microtubule-overlap length. Second, the width of the final overlap scales with microtubule lengths. Our analyses reveal how micron-scale geometrical features of antiparallel microtubules can regulate the activity of nanometer-sized proteins to define the structure and mechanics of microtubule-based architectures.

## 1 **Introduction**

2           The organization of microtubules into specialized architectures is required for a  
3 diverse range of cellular processes such as cell division, growth and migration [1, 2].  
4 Microtubule-crosslinking proteins play important roles in determining the relative  
5 orientation, size and dynamics of microtubule-based structures. These proteins include  
6 molecular motors that utilize the energy from ATP hydrolysis to mediate the transport of  
7 one microtubule over another (referred to as ‘relative sliding’) [3-5]. Motor proteins  
8 frequently act in conjunction with non-motor microtubule crosslinking proteins that  
9 oppose relative sliding and regulate both the stability and the size of the arrays [1, 2, 6].  
10 The activities of motor and non-motor proteins are in turn modulated by the microtubule  
11 cytoskeleton. At the nanometer length-scale, numerous tubulin isotypes and post-  
12 translational modifications on tubulin act as a code to tune the activity of microtubule  
13 associated proteins (MAPs) [7-10]. In addition, it is becoming apparent that at the  
14 micron length-scale, the geometrical properties of microtubule bundles, such as  
15 orientation, filament length and overlap length, also modulate the output of motor and  
16 non-motor proteins [11-13]. Currently, we have a limited understanding of the  
17 mechanisms by which the micron-sized features of a microtubule network are ‘read’ and  
18 ‘translated’ by associated proteins.

19           Arrays of overlapping antiparallel microtubules form the structural backbone of  
20 diverse cellular structures. Several insights into the mechanisms underlying the  
21 assembly of such arrays have come from examining the non-motor antiparallel  
22 microtubule crosslinking proteins of the PRC1/Ase1/MAP65 family. These evolutionarily  
23 conserved proteins play an important role in organizing microtubule arrays in interphase

24 yeast and plant cells, and subsets of spindle microtubules in dividing cells in all  
25 eukaryotes [14-19]. It is observed that these passive non-motor proteins act in concert  
26 with a number of different motor proteins, such as those of the kinesin-4, kinesin-5,  
27 kinesin-6 and kinesin-14 families [17, 18, 20-30]. A subset of these kinesins, such as  
28 Kif4A, Kif23 and Kif20, directly bind PRC1/MAP65/Ase1 family proteins [21, 24, 25, 28,  
29 31-33]. The diversity in the properties of motor proteins that act in conjunction with the  
30 different PRC1 homologs affords a powerful model system to elucidate the biophysical  
31 principles governing the organization of antiparallel microtubule arrays. However, thus  
32 far, the mechanistic studies of PRC1-kinesin systems have mainly focused on  
33 elucidating how microtubule sliding by kinesins is regulated by PRC1 homologs [26, 34,  
34 35]. How the initial geometry of PRC1-crosslinked microtubules modulates the activities  
35 of associated motor proteins is poorly understood.

36 Here we address this question by examining the relative sliding of PRC1-  
37 crosslinked antiparallel microtubules by the kinesin Kif4A. The collective activity of  
38 PRC1 and Kif4A is required for the organization of the spindle midzone, an antiparallel  
39 bundle of microtubules that is assembled between the segregating chromosomes at  
40 anaphase in dividing cells [31, 32, 36-38]. Kif4A, a microtubule plus-end directed motor  
41 protein is recruited to the midzone array through direct binding with PRC1, where it acts  
42 to suppress microtubule dynamics [25, 28, 38]. Previous *in vitro* studies with the  
43 *Xenopus Laevis* homologs of these proteins also suggest that they can drive the relative  
44 sliding of antiparallel microtubules over short distances [25]. However, microtubule  
45 sliding by Kif4A and its modulation by the geometrical features of the initial PRC1-  
46 crosslinked microtubules remains poorly characterized. In addition to sliding, it is

47 observed that the processive movement of PRC1-Kif4A complexes and their slow  
48 dissociation from the microtubule end result in the accumulation of both proteins in  
49 micron-sized zones at the plus-ends of single microtubules (hereafter referred to as  
50 'end-tags'). It is observed that: (i) the movement of motor molecules is hindered at end-  
51 tags formed on single microtubules, likely due to molecular crowding and (ii) the size of  
52 end-tags increases with microtubule length [28]. How the length-dependent  
53 accumulation of PRC1-Kif4A molecules on single microtubules impacts the organization  
54 of antiparallel bundles is unknown.

55 Here we show using TIRF-microscopy based assays that the collective activity of  
56 PRC1 and Kif4A results in relative microtubule sliding and concurrent end-tag formation  
57 on antiparallel microtubules. Interestingly, we find that PRC1-Kif4A end-tags act as  
58 roadblocks to prevent the complete separation of sliding microtubules. Consequently,  
59 sliding and stalling of antiparallel microtubules by PRC1 and Kif4A result in the  
60 assembly of a stable overlap that is spatially restricted to the filament plus-ends.  
61 Surprisingly, quantitative examination of the data reveals that two aspects of the PRC1-  
62 Kif4A mediated microtubule organization are modulated by the initial geometry of  
63 crosslinked microtubules. First, the sliding velocity in this system scales with the initial  
64 length of the antiparallel overlap. Second, the size of the final stable antiparallel overlap  
65 established by PRC1 and Kif4A scales with the lengths of the crosslinked microtubules.  
66 Together with computational modeling, our observations provide insights into the  
67 principles by which the geometrical features of antiparallel arrays can be translated to  
68 graded mechanical and structural outputs by microtubule associated motor and non-  
69 motor proteins.

## 70 **Results**

### 71 **Collision of PRC1-Kif4A end-tags on sliding microtubules results in the formation** 72 **of antiparallel overlaps of constant steady-state length**

73 To investigate microtubule sliding in the PRC1-Kif4A system, we reconstituted  
74 the activity of the kinesin Kif4A on a pair of antiparallel microtubules crosslinked by the  
75 non-motor protein PRC1. For these studies, we adapted a Total Internal Reflection  
76 Fluorescence (TIRF) microscopy-based assay that we have previously used to examine  
77 relative sliding of PRC1-crosslinked microtubules by the motor-protein Eg5 [34]. First,  
78 biotinylated taxol-stabilized microtubules, labeled with rhodamine, were immobilized on  
79 a glass coverslip. Next, unlabeled PRC1 (0.2 nM) was added to the flow chamber and  
80 allowed to bind the immobilized microtubules. Finally, rhodamine-labeled non-  
81 biotinylated microtubules were flowed into the chamber to generate microtubule  
82 ‘sandwiches’ crosslinked by PRC1 on the glass coverslip (Fig. 1A). After washing out  
83 the unbound proteins, the final assay buffer containing Kif4A-GFP, PRC1 and ATP at  
84 specified concentrations was flowed into the chamber to initiate end-tag formation and  
85 microtubule sliding (Fig. 1A). Near-simultaneous multi-wavelength imaging of  
86 rhodamine-labeled microtubules and Kif4A-GFP showed that Kif4A preferentially  
87 accumulates in the overlap region of PRC1-crosslinked microtubules (Figs. 1B-D;  $t = 0$   
88 s; 0.2 nM PRC1 + 6 nM Kif4A-GFP). This is in agreement with prior findings that PRC1  
89 selectively accumulates at regions of antiparallel microtubule overlap regions and  
90 recruits Kif4A to these sites [25, 34]. In the example shown in Figs. 1B-D, the average  
91 fluorescence intensity of Kif4A-GFP in the microtubule overlap region is 5-fold higher  
92 than the fluorescence intensity in the non-overlapped region at the first time point

93 recorded (Figs. 1B-E;  $t = 0$  s). In addition, time-lapse imaging shows an enhanced  
94 accumulation of Kif4A-GFP at the plus-ends of both the crosslinked microtubules. We  
95 refer to this region of high protein density at microtubule plus-ends as ‘end-tags’ (Figs.  
96 1B-E;  $t = 10$ – $40$  s;  $\sim 2.5$  fold enrichment of Kif4A-GFP at end-tags over the untagged  
97 overlap at 10 s). These data indicate that under these conditions Kif4A-GFP-containing  
98 end-tags are established at the plus-ends of crosslinked microtubules.

99 Time-lapse imaging and kymography-based analyses revealed that the end-  
100 tagged antiparallel microtubules slide relative to each other (Figs. 1B-D and 1F-H).  
101 Strikingly, we find that microtubule sliding stalls when the end-tags arrive at close  
102 proximity (Figs. 1B-D and 1F-H). This results in the formation of stable antiparallel  
103 overlaps that maintain a constant steady-state width for the entire duration of the  
104 experiment (Figs. 1B-D and 1F-H;  $t = 10$  mins). Under these experimental conditions,  
105 we do not observe any event where the moving microtubule slides past the end-tag of  
106 the immobilized microtubule. We rarely (5%) observe sliding microtubules stall before  
107 they arrive at the plus-end of the immobilized microtubule. These observations indicate  
108 that the formation of stable antiparallel overlaps is due to the end-tags on the  
109 crosslinked microtubule pair arriving at close proximity during relative sliding.

110 We next examined PRC1 localization on sliding microtubules by conducting  
111 experiments similar to that described above, except with GFP-labeled PRC1 and  
112 unlabeled Kif4A (Figs. 1I-K; 0.5 nM GFP-PRC1 + 6 nM Kif4A). We find that the  
113 localization pattern of GFP-PRC1 is similar to Kif4A with the highest fluorescence  
114 intensity at the end-tags, intermediate intensity at the untagged microtubule overlap  
115 regions and the lowest intensity on single microtubules. Similar to the observations in

116 Figs. 1F-H, we find that sliding microtubules stall when their end-tags arrive in close  
117 proximity (Figs. 1I-K).

118 Together, these observations suggest that human PRC1-Kif4A complexes can  
119 drive the relative sliding of antiparallel microtubules over the distance of several  
120 microns. However, sliding comes to a halt at microtubule plus-ends resulting in the  
121 formation of stable antiparallel overlaps of constant steady state length.

122

### 123 **Characterization of relative microtubule sliding in the PRC1-Kif4A system**

124 To further characterize relative sliding in mixtures of PRC1 and Kif4A, we  
125 quantitatively examined the microtubule movement observed in these experiments.  
126 Analysis of the instantaneous velocity during microtubule sliding (Figs. 2A-C; 0.2 nM  
127 PRC1 + 6 nM Kif4A-GFP), reveals three phases: (1) initial sliding at constant velocity,  
128 (2) reduction in sliding velocity as the end-tags arrive at close proximity, and (3)  
129 microtubule stalling and the formation of stable overlaps that persist for the duration of  
130 the experiment.

131 We first focused on microtubule movement in phase-1 and investigated how the  
132 relative solution concentrations of the motor and the non-motor protein impact the initial  
133 sliding velocity. This is particularly interesting in the case of PRC1-Kif4A system as the  
134 recruitment of Kif4A to microtubules is dependent on PRC1 [25, 28]. Therefore, one  
135 possible outcome is that motor-protein movement is sterically hindered at higher PRC1  
136 concentrations resulting in lower sliding velocities. Alternatively, it is possible that more  
137 Kif4A is recruited to microtubule overlaps at higher PRC1 concentrations and this could  
138 counter the potentially inhibitory effects of PRC1. To distinguish between these



139 mechanisms, we compared the maximum microtubule sliding velocity (computed as the  
140 average velocity from phase-1) at two different PRC1:Kif4A concentration ratios (Fig.  
141 2D). We found that increasing the PRC1 solution concentration 5-fold (0.2 and 1 nM) at  
142 constant Kif4A-GFP concentration (6 nM) resulted in a 4-fold reduction in the  
143 microtubule sliding velocity (velocity =  $60 \pm 17$  nm/s at 0.2 nM and velocity= $15 \pm 8$  nm/s  
144 at 1 nM). Similarly, in assays with GFP-PRC1 and unlabeled Kif4A, we found that  
145 increasing PRC1 concentration 2-fold (0.5 and 1 nM) at constant Kif4A levels (6 nM)  
146 resulted in a ~2-fold reduction in the microtubule sliding velocity (Supp. Fig. 1A;  
147 velocity= $35 \pm 13$  nm/s at 0.5 nM and velocity= $18 \pm 6$  nm/s at 1 nM PRC1). Interestingly,  
148 in these experiments, we could restore the sliding velocity by compensating the 2-fold  
149 increase in the PRC1 concentration with a 2-fold increase in the Kif4A concentration  
150 (Supp. Fig. 1A).

151 One possible explanation for the reduced velocity at the higher PRC1:Kif4A  
152 concentration is that there are fewer Kif4A molecules in the overlap due to competition  
153 from PRC1 for binding sites on the microtubule surface. Therefore, we compared the  
154 Kif4A-GFP density in the untagged overlap at two different solution PRC1  
155 concentrations (Fig. 2E). The data show that a 5-fold increase in the PRC1  
156 concentrations results in a 2-fold increase in the average Kif4A density in the untagged  
157 overlap region, indicating that Kif4A is effectively recruited to antiparallel overlaps at the  
158 highest PRC1 concentrations in our assays (Fig. 2E). Together, these results are  
159 consistent with a mechanism in which the solution concentration of PRC1:Kif4A sets the  
160 sliding velocity by determining the relative ratio of sliding-competent PRC1-Kif4A  
161 complexes to sliding-inhibiting PRC1 molecules in the antiparallel overlap.

162 **Microtubule sliding velocity in the PRC1-Kif4A system scales with initial overlap**  
163 **length**

164 We next examined if the initial width of the PRC1-crosslinked anti-parallel  
165 overlap impacts the sliding velocity. Remarkably, analysis of three different datasets  
166 suggests that antiparallel microtubules with longer initial overlaps slide at a higher  
167 velocity than microtubules with shorter initial overlaps under the same experimental  
168 condition (Figs. 3A-B). Note: no obvious trend was observed at the higher PRC1  
169 concentration, possibly due to the high scatter in the data and the low sliding velocities  
170 (Fig. 3A; red squares). We also analyzed the data to determine if the microtubule  
171 sliding velocity depended on the amount of Kif4A-GFP at end-tags. However, no clear  
172 correlation was observed between these parameters using the same dataset where the  
173 sliding velocity depends on the initial overlap length (Supp. Fig. 1B; 0.2 nM PRC1 + 6  
174 nM Kif4A-GFP, grey circles). These data suggest that the activity of PRC-Kif4A  
175 molecules in the untagged region of the antiparallel microtubule overlap is likely  
176 responsible for overlap length-dependent sliding velocity.

177 In order to separate the effect of microtubule length versus antiparallel overlap  
178 length on the sliding velocity, we re-plotted the data in Figs. 3A-B based on the length of  
179 the moving microtubule (i.e. the filament subjected to viscous drag). A scatter plot of the  
180 sliding velocity as a function of initial overlap length color-coded by the moving-  
181 microtubule length shows that longer microtubules typically form longer initial overlaps  
182 that exhibit faster sliding (Figs. 3C-D). However, the observation that long microtubules  
183 that form short overlaps exhibit slower sliding than long microtubules that form long  
184 overlaps (for example: 6  $\mu\text{m}$  microtubules with  $\sim 3 \mu\text{m}$  overlap in Fig. 3C, blue dots),

185 suggests the dominant contribution to the sliding velocity is from the initial overlap  
186 length (Figs. 3C-D). Our findings indicate that the initial length of the antiparallel overlap  
187 can tune the microtubule sliding velocity, such that longer overlaps slide at a faster rate  
188 than shorter microtubule overlaps.

189 The finding that sliding velocity scales with initial overlap length raised another  
190 question: is the abrupt shift from constant to decreasing sliding velocity (phase-1 to  
191 phase-2) observed in these experiments due to the transition from constant to  
192 decreasing overlap length as the moving microtubule slides past the immobilized  
193 microtubule? Such a mechanism has been described previously for the Ase1 and Ncd  
194 system (*S. pombe* PRC1 and Kinesin-14 homologs) [26]. To answer this question, we  
195 compared the time-dependent changes in the sliding velocity with total overlap length  
196 ( $L_{\text{overlap}}$ ) and found no obvious correlation between these parameters. For example, in  
197 the kymograph shown in Fig. 3E, the reduction in microtubule overlap length begins at  
198 0s (Fig. 3G, solid red line) but a significant reduction in the velocity is not seen until 60s  
199 (Fig. 3F, solid black line; see also Supp. Figs. 1J-L). Instead, the data suggest that the  
200 transition from sliding to stalling coincides with the end-tags on the moving and  
201 immobilized microtubules arriving at close proximity (Figs. 3E-F).

202 The observation that microtubule sliding occurs at a constant velocity even as the  
203 overlap shrinks, raises the following question: do the number of Kif4A molecules in the  
204 overlap change during relative sliding? Analyses of GFP intensity versus time showed  
205 that in phase-1, the total amount of Kif4A-GFP in the microtubule overlap  
206 ( $I_{\text{overlap}} = I_{\text{end-tagged}} + I_{\text{untagged}}$ ) initially increases and then reaches a constant level  
207 that is maintained during all three phases (dashed gray line) (Fig. 3H and Supp. Fig.

208 1L). This result suggests that Kif4A is retained in the shrinking overlap during sliding. Is  
209 this retention entirely due to end-tag formation or is there retention of Kif4A molecules in  
210 the untagged overlap during microtubule sliding? To answer this question, we  
211 quantitatively analyzed the Kif4A-GFP levels in the untagged region of the overlap  
212 during sliding. We find that while the total Kif4A-GFP levels in the untagged overlap  
213 region ( $I_{\text{untagged}}$ ) (Fig. 3H; solid purple curve) decrease with shrinking overlap, the  
214 Kif4A-GFP density ( $\rho_{\text{untagged}}$ ) (Fig. 3H; solid green curve; fluorescence intensity/pixel)  
215 increases two-fold with time. These findings suggest that as the overlap shrinks due to  
216 sliding, a fraction of the motor molecules is retained in the untagged region of the  
217 microtubule overlap, and possibly contributes to maintaining a constant sliding velocity.

218 Together, these data indicate that the velocity of microtubule sliding in the PRC1-  
219 Kif4A system is determined by the initial width of the PRC1-crosslinked antiparallel  
220 overlap. The microtubule-movement can subsequently proceed at a constant velocity,  
221 even as the overlap shrinks, possibly through the concentration of motor molecules  
222 within the overlap during relative sliding.

223

224 **The size of stable antiparallel overlaps established by PRC1 and Kif4A are**  
225 **determined by microtubule length and protein concentration**

226 Our findings suggest that in the PRC1-Kif4A system, a stable antiparallel overlap  
227 is formed when the end-tags on both microtubules merge during relative sliding. We  
228 hypothesized that if stable overlaps form upon the collision of end-tags formed on the  
229 moving and immobilized microtubules, then the final overlap length ( $L_{FO}$ ) should be  
230 determined by the sum of the two end-tag lengths ( $L_{ET1} + L_{ET2}$ ) (Fig. 4A). Consistent

231 with this, the average ratio of the  $\frac{L_{FO}}{L_{ET1} + L_{ET2}}$  at 1 nM PRC1 + 6 nM Kif4A-GFP is ~1 (Fig.  
232 4B, red). Similar results were observed when the experiments were performed under  
233 three different conditions with GFP-PRC1 and untagged Kif4A (Supp. Fig. 2A). These  
234 findings indicate that the width of the stable microtubule overlap established by PRC1  
235 and Kif4A is approximately equal to the sum of the end-tag lengths on both  
236 microtubules. At the lowest concentration of PRC1 tested (0.2 nM PRC1 + 6 nM Kif4A-  
237 GFP), the final overlap length was shorter than the  $L_{ET1} + L_{ET2}$ , as indicated by a ratio of  
238  $< 1$  (Fig. 4B, black). A possible reason is that under these conditions, the end-tagged  
239 regions of the microtubules have a greater fraction of unoccupied sites that allows for  
240 further sliding and reduction in the overlap length after the collision of end-tags.

241 Prior work shows that the collective activities of PRC1 and Kif4A on single  
242 microtubules result in the formation of end-tags whose size scales with microtubule  
243 length [28]. This raises the question of whether the width of stable antiparallel overlap  
244 established by these proteins depends on the lengths of the two crosslinked  
245 microtubules. To examine this, we plotted the final overlap length ( $L_{FO}$ ) as a function of  
246 the immobilized microtubule length ( $M_{L1}$ ), moving microtubule length ( $M_{L2}$ ) and sum of  
247 both microtubule lengths ( $M_{L1} + M_{L2}$ ). In all three cases, we find that the final overlap  
248 length increases linearly with microtubule length (Figs. 4C-E). The slope of the line is  
249 higher at greater PRC1 concentration due to longer end-tags formed under these  
250 conditions (Fig. 4E; 0.2 nM PRC1 + 6 nM Kif4A-GFP, slope = 0.3; 1 nM PRC1 + 6 nM  
251 Kif4A-GFP, slope = 0.8). These data suggest that PRC1-Kif4A end-tags act as a barrier  
252 to microtubule sliding and establish a stable antiparallel overlap whose size is  
253 determined by the microtubule lengths.

254 **Examination of the mechanisms that ensure stability of the overlaps established**  
255 **by PRC1 and Kif4A**

256         Why does the merging of PRC1-Kif4A end-tags during microtubule sliding result  
257 in the formation of a stable antiparallel overlap? It has been shown that the entropic  
258 forces induced by Ase1p molecules (*S. pombe* PRC1 homolog) can counter the  
259 microtubule sliding-associated forces generated by Ncd (kinesin-14) molecules to  
260 establish a stable antiparallel overlap [35]. We therefore examined if similar entropic  
261 forces are generated in the stalled microtubule overlaps established by PRC1 and Kif4A  
262 in our experiments. First, we induced the formation of stable overlaps through  
263 microtubule sliding and stalling in the presence of GFP-PRC1, Kif4A and ATP. Next, we  
264 washed the assay chamber twice with buffer containing no ATP to remove any unbound  
265 protein and nucleotide. Under this 'no-nucleotide' condition, we expect that the PRC1-  
266 Kif4A complexes in the microtubule overlap would essentially function as passive  
267 crosslinkers. Dual-wavelength time-lapse images were acquired for 10 mins  
268 immediately following buffer exchange. Image analysis revealed that while PRC1 was  
269 retained in the region of the microtubule overlap under these conditions, the width of the  
270 antiparallel overlap did not change during the course of the experiment (Supp. Figs. 3A-  
271 B). The lack of overlap expansion in the PRC1-Kif4A system may be due to the tight  
272 binding of the kinesin motor domain to microtubules in the absence of a nucleotide. To  
273 address this, we performed the experiment as discussed above, except the final buffer  
274 was supplemented with 2 mM ADP, a nucleotide that lowers the kinesin-microtubule  
275 affinity. As shown in Supp. Figs. 3C-F, no overlap expansion was observed under these  
276 conditions. The inclusion of 1 nM PRC1 in addition to 2 mM ADP in the final buffer also

277 did not promote overlap expansion (Supp. Figs. 3G-H). Therefore, neither motor  
278 deactivation with ADP nor increasing the number of PRC1 molecules is sufficient to  
279 induce entropic expansions of measurable magnitude in this system, suggesting that an  
280 alternative mechanism is likely responsible for countering the Kif4A-mediated sliding  
281 forces in the antiparallel overlap.

282 We have previously shown that PRC1-Kif4A end-tags on single microtubules  
283 hinder motor-protein stepping [28]. Therefore, we considered if the collision of end-tags  
284 on sliding microtubules generated a stable antiparallel overlap simply by providing a  
285 steric block to sliding. To test this hypothesis, we generated stable antiparallel overlaps  
286 with PRC1, Kif4A-GFP and ATP, and subsequently exchanged the nucleotide to ADP  
287 by buffer exchange (Figs. 5A-C). As expected, no change in the overlap length was  
288 observed upon nucleotide exchange from ATP to ADP. We reasoned that under these  
289 experimental conditions, the gradual dissociation of proteins at a slow rate from the  
290 overlap should liberate a small fraction of kinesin and PRC1 binding sites on the  
291 microtubule (note: intensity analysis suggests a maximum 10% reduction of Kif4A-GFP  
292 in 2 mins). Therefore, if the moving microtubule had initially stalled due to protofilament  
293 crowding, then re-introducing ATP should allow motor-protein stepping and reinitiate  
294 microtubule sliding. To test this experimentally, we introduced buffer containing 1 mM  
295 ATP (no additional protein) into the chamber 15 mins after the ADP exchange step (Fig.  
296 5D). We find that relative microtubule sliding is reinitiated under these conditions.  
297 Analysis of the GFP fluorescence-intensity profile at different time-points post buffer  
298 exchange revealed that new end-tags are established during microtubule sliding, which

299 subsequently collide to establish a new stable antiparallel overlap of shorter width (Fig.  
300 5E).

301 Together, these findings are consistent with a mechanism in which PRC1-Kif4A  
302 end-tags establish stable overlaps by sterically hindering the relative sliding of  
303 antiparallel microtubules. Such a 'molecular road-block' based mechanism also  
304 provides a simple explanation for the observed correlation between the sum of end-tag  
305 lengths and the final overlap length in this system.

306

### 307 **PRC1 and Kif4A align the overlap region between multiple antiparallel** 308 **microtubules**

309 How does microtubule sliding and stalling by PRC1 and Kif4A shape larger  
310 microtubule arrays? To gain insights into this question, we carefully examined the few  
311 events ( $N < 10$ ) where we could clearly observe two microtubules slide relative to a  
312 single immobilized microtubule. In these events (Figs. 6A-C; 0.2 nM PRC1 + 6 nM  
313 Kif4A-GFP), we observed that both the sliding microtubules stall proximal to the plus  
314 end-tag on the immobilized microtubule. Another example of such an event in  
315 experiments with GFP-labeled PRC1 and unlabeled Kif4A is shown in Figs. 6D-F (1 nM  
316 GFP-PRC1 + 6 nM Kif4A). The data suggest that the formation of end-tags on single  
317 microtubules can establish an antiparallel array composed of multiple microtubules with  
318 closely aligned plus-ends.

319 We analyzed five reorganization events where we could reliably measure  
320 microtubule and overlap lengths to determine if longer microtubules result in larger final  
321 overlaps in these more complex bundles. While we cannot assess the three-



322 dimensional arrangement of the microtubules in the bundles, a simple analysis of  
323 microtubule and overlap lengths suggests that in general bundles with longer  
324 microtubules are likely to yield longer final overlaps (Supp. Fig. 4).

325 Together, these observations suggest that microtubule sliding and stalling by  
326 PRC1 and Kif4A can align multiple antiparallel filaments such that the region of overlap  
327 is restricted to the plus-ends of all the microtubules.

328

## 329 **Discussion**

330 Pairs of crosslinked antiparallel microtubules are fundamental structural units in  
331 diverse microtubule-based architectures [1, 2]. Our findings provide insights into how  
332 the geometrical features of antiparallel microtubule arrays can be ‘decoded’ by PRC1-  
333 Kif4A complexes to govern the dynamics, stability and architecture of microtubule  
334 networks.

335 On the basis of our observations, we propose a mechanism for the organization  
336 of stable microtubule length-dependent antiparallel overlaps by the collective activities  
337 of PRC1 and Kif4A. PRC1 specifically crosslinks and preferentially localizes to the  
338 region of overlap between two antiparallel microtubules (Fig. 7) [25, 34]. Kif4A is  
339 recruited to the antiparallel overlap through direct interaction with PRC1 [25, 28]. The  
340 highly processive movement of PRC1-Kif4A complexes on microtubules and the slow  
341 dissociation of these proteins from microtubule plus-ends result in the formation of ‘end-  
342 tags’ on both microtubules (Fig. 7) [28]. In addition, the movement of PRC1-Kif4A  
343 complexes within antiparallel overlaps results in robust relative microtubule sliding (Fig.  
344 7). Our results suggest that microtubule sliding occurs primarily through stepping of the

345 motor protein in the untagged region of the microtubule overlap. During relative sliding,  
346 as the moving microtubule moves past the length of the immobilized microtubule, the  
347 distance between the end-tags at the plus-ends of both microtubules begins to shrink  
348 (Fig. 7). Microtubule movement stalls when the two end-tags arrive at close proximity  
349 during relative sliding (Fig. 7). This is likely due to the high occupancy of tubulin at end-  
350 tags, which provide steric hindrance to motor protein stepping and impede microtubule  
351 sliding [28]. An important consequence of such a ‘road-block’ mechanism is that the  
352 final overlap width is determined by the size of the end-tags formed on individual  
353 microtubules, which in turn scales with filament lengths and protein concentrations (Fig.  
354 7).

355 Non-motor crosslinking proteins are primarily thought to contribute to the size  
356 and stability of microtubule arrays by opposing the active forces generated by motor  
357 proteins [39]. Microtubule organization in the PRC1-Kif4A system reveals an alternative  
358 mechanism in which a motor and a non-motor protein act synergistically on antiparallel  
359 microtubules to first promote relative sliding and then stall microtubule movement by  
360 forming a molecular roadblock. Some of the distinct features of this mechanism are as  
361 follows. First, in this system, stable arrays can be established under conditions where  
362 the non-motor:motor protein ratio may not be not sufficiently high to achieve force-  
363 balance. This is particularly advantageous in the case of interacting proteins, such as  
364 PRC1 and Kif4A, where increasing the concentration of PRC1 leads to a concomitant  
365 increase in both the levels of motor and non-motor proteins further shifting the force-  
366 balance point. Second, this system allows for robust relative sliding until the end-tags  
367 collide. This in turn leads to the establishment of stable antiparallel overlaps that are

368 spatially restricted to microtubule plus-ends. Third, it provides a simple mechanism by  
369 which the formation of length-dependent PRC1-Kif4A end-tags on single microtubules  
370 can be readily translated to the organization of microtubule overlaps whose size scales  
371 with microtubule length.

372 Surprisingly, we find that the sliding velocity in the PRC1-Kif4A system is  
373 proportional to the initial antiparallel microtubule overlap length (Fig. 7). While the  
374 scaling of movement velocity with motor number has been proposed for microtubule-  
375 based transport of cargoes in the cellular cytoplasm [40-42], it is not typically observed  
376 in microtubule sliding by an ensemble of processive kinesins in *in vitro* assays. One  
377 proposed reason is the low viscous drag experienced by the moving microtubule in  
378 aqueous buffers relative to the intracellular environment, and the high magnitude of  
379 forces generated by kinesin molecules [43, 44]. Our observations in the PRC1-Kif4A  
380 system suggest that the intrinsic activity of microtubule crosslinking proteins can result  
381 in the scaling of relative sliding velocity with microtubule-overlap length even in the  
382 absence of substantial external viscous drag forces.

383 How might the microtubule sliding velocity scale with initial overlap length? Hints  
384 to a possible mechanism come from recent studies that investigate how the physical  
385 properties of cargoes impact microtubule sliding by motor proteins [26, 45, 46]. For  
386 example, it is observed that when kinesin motors are anchored to a diffusive lipid  
387 surface instead of a rigid glass coverslip, the gliding velocity of attached microtubules is  
388 dependent on the number of motor molecules [26]. To understand the observed scaling  
389 of velocity in the PRC1-Kif4A system, we consider the nature of the 'cargo' borne by the  
390 Kif4A molecule (Appendix Fig. 1). The C-terminus non-motor domain of Kif4A binds the

391 N-terminus of dimeric PRC1 [28]. The spectrin domains at the C-terminus of PRC1  
392 diffusively binds and crosslinks both microtubules (Appendix. Fig. 1) [34]. Therefore  
393 the ‘moving’ microtubule is likely to be loosely coupled to the kinesin via a diffusive  
394 PRC1-microtubule linkage. In this scenario, the overall stepping efficiency is not 100%,  
395 as every 8 nm step of the kinesin does not translate into an 8 nm movement of the  
396 microtubule due to slippage arising from PRC1 diffusion. Other factors such as force  
397 dependent dissociation of PRC1-Kif4A during microtubule movement could contribute to  
398 a further reduction in the coupling between the two microtubules. We adapted the  
399 formulation developed by Grover et. al. to antiparallel sliding by PRC1 and Kif4A, and  
400 find that it can qualitatively recapitulate the velocity trend observed in our experiments  
401 (Appendix Text and Appendix Fig. 1) [46]. The modeling reveals that the diffusion  
402 constant of PRC1 and the total number of binding sites available for PRC1-Kif4A  
403 crosslinking are likely to be key parameters in determining the extent of velocity scaling  
404 with the initial overlap length (Appendix Fig. 1). Together, these analyses suggest a  
405 potential mechanism by which the velocity of microtubule sliding by PRC1 and Kif4A  
406 can scale with antiparallel overlap length.

407 A defining architectural feature of the spindle midzone is a stable antiparallel  
408 microtubule array with overlapping plus-ends [6, 47]. Cell-biological analyses in different  
409 model organisms indicate that both microtubule sliding and accumulation of proteins at  
410 microtubule plus ends occur on midzone arrays. The relative sliding of PRC1-  
411 crosslinked microtubules by motor proteins such as Cin8 and Kip3p in budding yeast  
412 and KLP61F in drosophila is thought to mediate the spindle elongation during early  
413 anaphase and contribute to defining the overlap width [48-50]. The accumulation of

414 proteins at microtubule plus-ends, including multiple mitotic kinesins, is thought to  
415 effectively concentrate cytokinesis factors proximal to the site of cell cleavage [36, 47,  
416 51]. Our biophysical analyses suggest that the geometrical features of the overlapping  
417 microtubules in the spindle may in turn tune the activity of associated proteins, and  
418 regulate the geometry and stability of the spindle midzone.

419 In summary, our studies show how two microtubule-associated proteins, each  
420 with its own distinct filament binding properties, can act collectively to ‘measure’ the  
421 geometrical features of microtubules arrays and ‘translate’ them to generate well-  
422 defined mechanical and structural outputs. Filament crosslinking, relative-sliding and  
423 molecular crowding are likely to represent general features of a number of biological  
424 polymers, such as actin filaments and nucleic acids, that are dynamically organized  
425 during different cellular processes. The mechanism revealed here can therefore  
426 represent general principles that regulate the size and dynamics of cellular architectures  
427 built from different polymers.

428

## 429 **Materials and Methods**

### 430 **Protein purification**

431 Recombinant proteins used in this study (PRC1, PRC1-GFP, Kif4A and Kif4A-  
432 GFP) were expressed and purified as described previously [28, 34].

### 433 **Microtubule polymerization**

434 GMPCPP polymerized and taxol stabilized rhodamine-labeled microtubules were  
435 prepared with and without biotin tubulin as described previously [28, 34] . Briefly,

436 GMPCPP seeds were prepared from a mixture of unlabeled bovine tubulin, X-  
437 rhodamine-tubulin and biotin tubulin, which were diluted in BRB80 buffer (80 mM PIPES  
438 pH 6.8, 1.5 mM MgCl<sub>2</sub>, 0.5 mM EGTA, pH 6.8) and mixed together by tapping gently.  
439 The tube was transferred to a 37°C heating block and covered with foil to reduce light  
440 exposure. Non-biotinylated microtubules and biotinylated microtubules were incubated  
441 for 20 mins and 1 h 45 mins, respectively. Afterwards, 100 µL of warm BRB80 buffer  
442 was added to the microtubules and spun at 75000 rpm, 10 mins, and 30°C to remove  
443 free unpolymerized tubulin. Following the centrifugation step, the supernatant was  
444 discarded and the pellet was washed by round of centrifugation with 100 µL BRB80  
445 supplemented with 20 µM taxol. The pellet was resuspended in 16 µL of BRB80  
446 containing 20 µM taxol and stored at room temperature covered in foil.

#### 447 ***In vitro* fluorescence microscopy assay**

448 The microscope slides (Gold Seal Cover Glass, 24×60 mm, thickness No.1.5)  
449 and coverslips (Gold Seal Cover Glass, 18×18 mm, thickness No.1.5) are cleaned and  
450 functionalized with biotinylated PEG and nonbiotinylated PEG, respectively, to prevent  
451 nonspecific surface sticking, according to standard protocols [28, 34]. Flow chambers  
452 were built by applying two strips of double-sided tape to a slide and applying to the  
453 coverslip. Sample chamber volumes were approximately 6-8 µL.

454 Experiments were performed as described previously [28, 34]. To make  
455 antiparallel microtubule bundles, biotinylated microtubules (referred to as ‘immobilized  
456 microtubules’ in text), labeled with rhodamine, were immobilized in a flow chamber by  
457 first coating the surface with neutravidin (0.2 mg/ml). Next, 0.2 nM un-labeled PRC1 in

458 BRB80 + 5 % sucrose was flushed into the flow chamber. Finally, non-biotinylated  
459 (referred to as moving microtubules) were flushed in the flow cell and incubated for 10-  
460 15 mins to allow antiparallel overlap formation with the PRC1-decorated immobilized  
461 microtubules. To visualize microtubule sliding, PRC1 and Kif4A-GFP and 1 mM ATP  
462 were flowed into the chamber in assay buffer (BRB80 buffer supplemented with 1 mM  
463 TCEP, 0.2 mg/ml k-casein, 20  $\mu$ M taxol, 40 mg/ml glucose oxidase, 35 mg/ml glucose  
464 catalase, 0.5% b-mercaptoethanol, 5% sucrose and 1 mM ATP) and a time-lapse  
465 sequence of images was immediately acquired at a rate of 3 frames/s. Data were  
466 collected for 10-15 mins. Key experiments and analysis were also performed with GFP-  
467 PRC1 and non-fluorescent Kif4A to rule out the effect of GFP on microtubule sliding and  
468 stalling by PRC1 and Kif4A.

469 All experiments were performed on Nikon Ti-E inverted microscope with a Ti-  
470 ND6-PFS perfect focus system equipped with a APO TIRF 100x oil/1.49 DIC objective  
471 (Nikon). The microscope was outfitted with a Nikon-encoded x-y motorized stage and a  
472 piezo z-stage, an sCMOS camera (Andor Zyla 4.2), and two-color TIRF imaging optics  
473 (lasers: 488 nm and 561 nm; Filters: Dual Band 488/561 TIRF exciter). Rhodamine-  
474 labeled microtubules and GFP-labeled proteins (either PRC1 or Kif4A) in microtubule  
475 sliding assays were visualized sequentially by switching between FITC and TRITC  
476 channels.

## 477 **Image analysis**

478 ImageJ (NIH) was used to process the image files. Briefly, raw time-lapse  
479 images were converted to tiff files. A rolling ball radius background subtraction of 50  
480 pixels was applied to distinguish the features in the images more clearly. From these

481 images, individual microtubules sliding events were picked and converted to  
482 kymographs by the MultipleOverlay and MultipleKymograph plug-ins (J. Reitdorf and A.  
483 Seitz; [https://www.embl.de/eamnet/html/body\\_kymograph.html](https://www.embl.de/eamnet/html/body_kymograph.html)). The following criteria  
484 were used to exclude events from the analysis: 1) Only kymographs where we could  
485 confidently identify exactly two microtubules in the bundle were examined further  
486 (except for the data in Fig. 6); 2) Sliding microtubules that encounter another bundle  
487 were excluded; 3) Pairs of microtubules with proximal plus-ends at initial time points  
488 could not be analyzed due to the very short duration of sliding; 4) For the sliding velocity  
489 versus initial overlap analysis, we only included kymographs where the initial overlap  
490 and the moving end-tag edge could be clearly distinguished (Figs. 2 and 3. Supp. Fig.  
491 1); 5) For the microtubule length versus final overlap analysis, we picked kymographs  
492 both the immobilized and the moving microtubule edges could be distinguished (Fig. 4);  
493 and 6) In Figs. 3A-D, we excluded data for initial overlaps greater than 5  $\mu\text{m}$  because of  
494 the existence of a few data points.

495 These kymographs were then further analyzed using a custom MATLAB  
496 program. The program first reads the input image and converts it to an array of intensity  
497 values. Next, using the 'bwboundaries' function, the high-intensity edges of the GFP  
498 channel kymograph were detected. If the features of the kymograph were clear, the  
499 edges of the immobilized end-tag and the moving end-tag were detected. Finally, any  
500 repeating elements due to a large amount of noise and poor contrast were removed by  
501 using the 'unique' function. The lines were then converted to  $x, y$  coordinates at each  
502 time point. For unclear MT or GFP channel kymographs, the kymographs can be further  
503 processed by ImageJ using the 'Find Connected Regions' plug-in (M. Longair;



504 [http://imagej.net/Find\\_Connected\\_Regions](http://imagej.net/Find_Connected_Regions)) to distinguish the features in the  
505 kymographs more clearly. This function separates regions in the kymograph based on  
506 criteria such as having the same intensity value for the detection of edges. Afterwards,  
507 these processed kymographs can be read through the MATLAB program as described  
508 above.

509 To calculate the sliding velocity, the derivative of the position versus time  
510 coordinates of the external edge of the moving microtubule end-tag from the GFP  
511 channel kymograph was taken. The overlap length ( $L_{\text{overlap}}$ ) was measured from the  
512 MT channel. The final overlap length ( $L_{FO}$ ) was measured from the MT channel when  
513 the end-tags have collided and reached a steady-state. The sum of the end-tag lengths,  
514  $L_{ET1}$  and  $L_{ET2}$ , were determined by measuring the end-tag length before the collision of  
515 the end-tags from the GFP channel. The sum of the microtubule lengths,  $M_{L1}$  and  $M_{L2}$ ,  
516 were measured from the rhodamine channel, and their sum was also plotted.

517 **Data availability:** The data that support the findings of this study are available from the  
518 corresponding author upon request.

519 **Supplementary Information:** The supplementary information contains Supp. Figs. 1-4.  
520 Appendix: The appendix contains the theoretical description of the scaling of sliding  
521 velocity with initial overlap and appendix references.

## 522 References

1. Dogterom, M. and T. Surrey, *Microtubule organization in vitro*. Curr Opin Cell Biol, 2013. **25**(1): p. 23-9.
2. Subramanian, R. and T.M. Kapoor, *Building complexity: insights into self-organized assembly of microtubule-based architectures*. Dev Cell, 2012. **23**(5): p. 874-85.

3. Sharp, D.J., G.C. Rogers, and J.M. Scholey, *Roles of motor proteins in building microtubule-based structures: a basic principle of cellular design*. Biochim Biophys Acta, 2000. **1496**(1): p. 128-41.
4. Tolic-Norrelykke, I.M., *Push-me-pull-you: how microtubules organize the cell interior*. Eur Biophys J, 2008. **37**(7): p. 1271-8.
5. Forth, S. and T.M. Kapoor, *The mechanics of microtubule networks in cell division*. J Cell Biol, 2017. **216**(6): p. 1525-1531.
6. Bratman, S.V. and F. Chang, *Mechanisms for maintaining microtubule bundles*. Trends Cell Biol, 2008. **18**(12): p. 580-6.
7. Gull, K., P.J. Hussey, R. Sasse, A. Schneider, T. Seebeck, and T. Sherwin, *Tubulin isoforms: generation of diversity in cells and microtubular organelles*. J Cell Sci Suppl, 1986. **5**: p. 243-55.
8. Luduena, R.F., *A hypothesis on the origin and evolution of tubulin*. Int Rev Cell Mol Biol, 2013. **302**: p. 41-185.
9. Yu, I., C.P. Garnham, and A. Roll-Mecak, *Writing and Reading the Tubulin Code*. J Biol Chem, 2015. **290**(28): p. 17163-72.
10. Gadadhar, S., S. Bodakuntla, K. Natarajan, and C. Janke, *The tubulin code at a glance*. J Cell Sci, 2017. **130**(8): p. 1347-1353.
11. Fink, G., L. Hajdo, K.J. Skowronek, C. Reuther, A.A. Kasprzak, and S. Diez, *The mitotic kinesin-14 Ncd drives directional microtubule-microtubule sliding*. Nat Cell Biol, 2009. **11**(6): p. 717-23.
12. Kuan, H.S. and M.D. Betterton, *Motor Protein Accumulation on Antiparallel Microtubule Overlaps*. Biophys J, 2016. **110**(9): p. 2034-43.
13. Shimamoto, Y., S. Forth, and T.M. Kapoor, *Measuring Pushing and Braking Forces Generated by Ensembles of Kinesin-5 Crosslinking Two Microtubules*. Dev Cell, 2015. **34**(6): p. 669-81.
14. Chan, J., C.G. Jensen, L.C. Jensen, M. Bush, and C.W. Lloyd, *The 65-kDa carrot microtubule-associated protein forms regularly arranged filamentous cross-bridges between microtubules*. Proc Natl Acad Sci U S A, 1999. **96**(26): p. 14931-6.
15. Loiodice, I., J. Staub, T.G. Setty, N.P. Nguyen, A. Paoletti, and P.T. Tran, *Ase1p organizes antiparallel microtubule arrays during interphase and mitosis in fission yeast*. Mol Biol Cell, 2005. **16**(4): p. 1756-68.
16. Yamashita, A., M. Sato, A. Fujita, M. Yamamoto, and T. Toda, *The roles of fission yeast ase1 in mitotic cell division, meiotic nuclear oscillation, and cytokinesis checkpoint signaling*. Mol Biol Cell, 2005. **16**(3): p. 1378-95.
17. Jiang, W., G. Jimenez, N.J. Wells, T.J. Hope, G.M. Wahl, T. Hunter, and R. Fukunaga, *PRC1: a human mitotic spindle-associated CDK substrate protein required for cytokinesis*. Mol Cell, 1998. **2**(6): p. 877-85.
18. Mollinari, C., J.P. Kleman, W. Jiang, G. Schoehn, T. Hunter, and R.L. Margolis, *PRC1 is a microtubule binding and bundling protein essential to maintain the mitotic spindle midzone*. J Cell Biol, 2002. **157**(7): p. 1175-86.
19. Polak, B., P. Risteski, S. Lesjak, and I.M. Tolic, *PRC1-labeled microtubule bundles and kinetochore pairs show one-to-one association in metaphase*. EMBO Rep, 2017. **18**(2): p. 217-230.

20. Zhu, C., E. Lau, R. Schwarzenbacher, E. Bossy-Wetzel, and W. Jiang, *Spatiotemporal control of spindle midzone formation by PRC1 in human cells*. Proc Natl Acad Sci U S A, 2006. **103**(16): p. 6196-201.
21. Gruneberg, U., R. Neef, X. Li, E.H. Chan, R.B. Chalamalasetty, E.A. Nigg, and F.A. Barr, *KIF14 and citron kinase act together to promote efficient cytokinesis*. J Cell Biol, 2006. **172**(3): p. 363-72.
22. Janson, M.E., R. Loughlin, I. Liodice, C. Fu, D. Brunner, F.J. Nedelec, and P.T. Tran, *Crosslinkers and motors organize dynamic microtubules to form stable bipolar arrays in fission yeast*. Cell, 2007. **128**(2): p. 357-68.
23. D'Avino, P.P., V. Archambault, M.R. Przewloka, W. Zhang, K.S. Lilley, E. Laue, and D.M. Glover, *Recruitment of Polo kinase to the spindle midzone during cytokinesis requires the Feo/Klp3A complex*. PLoS One, 2007. **2**(6): p. e572.
24. Fu, C., J.J. Ward, I. Liodice, G. Velve-Casquillas, F.J. Nedelec, and P.T. Tran, *Phospho-regulated interaction between kinesin-6 Klp9p and microtubule bundler Ase1p promotes spindle elongation*. Dev Cell, 2009. **17**(2): p. 257-67.
25. Bieling, P., I.A. Telley, and T. Surrey, *A minimal midzone protein module controls formation and length of antiparallel microtubule overlaps*. Cell, 2010. **142**(3): p. 420-32.
26. Braun, M., Z. Lansky, G. Fink, F. Ruhnnow, S. Diez, and M.E. Janson, *Adaptive braking by Ase1 prevents overlapping microtubules from sliding completely apart*. Nat Cell Biol, 2011. **13**(10): p. 1259-64.
27. Duellberg, C., F.J. Fourniol, S.P. Maurer, J. Roostalu, and T. Surrey, *End-binding proteins and Ase1/PRC1 define local functionality of structurally distinct parts of the microtubule cytoskeleton*. Trends Cell Biol, 2013. **23**(2): p. 54-63.
28. Subramanian, R., S.C. Ti, L. Tan, S.A. Darst, and T.M. Kapoor, *Marking and measuring single microtubules by PRC1 and kinesin-4*. Cell, 2013. **154**(2): p. 377-90.
29. Pringle, J., A. Muthukumar, A. Tan, L. Crankshaw, L. Conway, and J.L. Ross, *Microtubule organization by kinesin motors and microtubule crosslinking protein MAP65*. J Phys Condens Matter, 2013. **25**(37): p. 374103.
30. de Keijzer, J., H. Kieft, T. Ketelaar, G. Goshima, and M.E. Janson, *Shortening of Microtubule Overlap Regions Defines Membrane Delivery Sites during Plant Cytokinesis*. Curr Biol, 2017. **27**(4): p. 514-520.
31. Kurasawa, Y., W.C. Earnshaw, Y. Mochizuki, N. Dohmae, and K. Todokoro, *Essential roles of KIF4 and its binding partner PRC1 in organized central spindle midzone formation*. EMBO J, 2004. **23**(16): p. 3237-48.
32. Zhu, C. and W. Jiang, *Cell cycle-dependent translocation of PRC1 on the spindle by Kif4 is essential for midzone formation and cytokinesis*. Proc Natl Acad Sci U S A, 2005. **102**(2): p. 343-8.
33. Yardimci, H., M. van Duffelen, Y. Mao, S.S. Rosenfeld, and P.R. Selvin, *The mitotic kinesin CENP-E is a processive transport motor*. Proc Natl Acad Sci U S A, 2008. **105**(16): p. 6016-21.
34. Subramanian, R., E.M. Wilson-Kubalek, C.P. Arthur, M.J. Bick, E.A. Campbell, S.A. Darst, R.A. Milligan, and T.M. Kapoor, *Insights into antiparallel microtubule crosslinking by PRC1, a conserved nonmotor microtubule binding protein*. Cell, 2010. **142**(3): p. 433-43.

35. Lansky, Z., M. Braun, A. Ludecke, M. Schlierf, P.R. ten Wolde, M.E. Janson, and S. Diez, *Diffusible crosslinkers generate directed forces in microtubule networks*. Cell, 2015. **160**(6): p. 1159-68.
36. Shrestha, S., L.J. Wilmeth, J. Eyer, and C.B. Shuster, *PRC1 controls spindle polarization and recruitment of cytokinetic factors during monopolar cytokinesis*. Mol Biol Cell, 2012. **23**(7): p. 1196-207.
37. Nunes Bastos, R., S.R. Gandhi, R.D. Baron, U. Gruneberg, E.A. Nigg, and F.A. Barr, *Aurora B suppresses microtubule dynamics and limits central spindle size by locally activating KIF4A*. J Cell Biol, 2013. **202**(4): p. 605-21.
38. Hu, C.K., M. Coughlin, C.M. Field, and T.J. Mitchison, *KIF4 regulates midzone length during cytokinesis*. Curr Biol, 2011. **21**(10): p. 815-24.
39. Peterman, E.J. and J.M. Scholey, *Mitotic microtubule crosslinkers: insights from mechanistic studies*. Curr Biol, 2009. **19**(23): p. R1089-94.
40. Hill, D.B., M.J. Plaza, K. Bonin, and G. Holzwarth, *Fast vesicle transport in PC12 neurites: velocities and forces*. Eur Biophys J, 2004. **33**(7): p. 623-32.
41. Kural, C., H. Kim, S. Syed, G. Goshima, V.I. Gelfand, and P.R. Selvin, *Kinesin and dynein move a peroxisome in vivo: a tug-of-war or coordinated movement?* Science, 2005. **308**(5727): p. 1469-72.
42. Levi, V., A.S. Serpinskaya, E. Gratton, and V. Gelfand, *Organelle transport along microtubules in Xenopus melanophores: evidence for cooperation between multiple motors*. Biophys J, 2006. **90**(1): p. 318-27.
43. Braun, M., D.R. Drummond, R.A. Cross, and A.D. McAinsh, *The kinesin-14 Klp2 organizes microtubules into parallel bundles by an ATP-dependent sorting mechanism*. Nat Cell Biol, 2009. **11**(6): p. 724-30.
44. Gagliano, J., M. Walb, B. Blaker, J.C. Macosko, and G. Holzwarth, *Kinesin velocity increases with the number of motors pulling against viscoelastic drag*. Eur Biophys J, 2010. **39**(5): p. 801-13.
45. Conway, L., D. Wood, E. Tuzel, and J.L. Ross, *Motor transport of self-assembled cargos in crowded environments*. Proc Natl Acad Sci U S A, 2012. **109**(51): p. 20814-9.
46. Grover, R., J. Fischer, F.W. Schwarz, W.J. Walter, P. Schwille, and S. Diez, *Transport efficiency of membrane-anchored kinesin-1 motors depends on motor density and diffusivity*. Proc Natl Acad Sci U S A, 2016. **113**(46): p. E7185-E7193.
47. Glotzer, M., *The 3Ms of central spindle assembly: microtubules, motors and MAPs*. Nat Rev Mol Cell Biol, 2009. **10**(1): p. 9-20.
48. Sharp, D.J., K.L. McDonald, H.M. Brown, H.J. Matthies, C. Walczak, R.D. Vale, T.J. Mitchison, and J.M. Scholey, *The bipolar kinesin, KLP61F, cross-links microtubules within inter-polar microtubule bundles of Drosophila embryonic mitotic spindles*. J Cell Biol, 1999. **144**(1): p. 125-38.
49. Varga, V., C. Leduc, V. Bormuth, S. Diez, and J. Howard, *Kinesin-8 motors act cooperatively to mediate length-dependent microtubule depolymerization*. Cell, 2009. **138**(6): p. 1174-83.
50. Su, X., H. Arellano-Santoyo, D. Portran, J. Gaillard, M. Vantard, M. Thery, and D. Pellman, *Microtubule-sliding activity of a kinesin-8 promotes spindle assembly and spindle-length control*. Nat Cell Biol, 2013. **15**(8): p. 948-57.

51. Canman, J.C., L.A. Cameron, P.S. Maddox, A. Straight, J.S. Tirnauer, T.J. Mitchison, G. Fang, T.M. Kapoor, and E.D. Salmon, *Determining the position of the cell division plane*. Nature, 2003. **424**(6952): p. 1074-8.

## 523 **Acknowledgements**

524 The authors would like to thank Tarun Kapoor (Rockefeller Univ.) for generous support  
525 during initial stages of this project. The authors would also like to thank Scott Forth  
526 (RPI), Doug Martin (Lawrence College) and Tarun Kapoor (Rockefeller Univ.) for helpful  
527 comments.

## 528 **Author Contributions**

529 R.S. conceived and designed the project. S.S.W and R.S. performed experiments,  
530 analyzed the data and wrote the manuscript.

## 531 **Competing financial interests**

532 The authors declare no competing financial interests.

## 533 **Correspondence & Materials**

534 Correspondence and requests for materials should be addressed to R.S.  
535 (radhika@molbio.mgh.harvard.edu)

536

## 537 **Figure Legends**

538 **Fig. 1. Relative microtubule sliding and the formation of stable antiparallel**  
539 **microtubule overlaps by PRC1 and Kif4A.**

540 **(A)** Schematic of the *in vitro* assay. A biotinylated microtubule ('immobilized MT', X-  
541 rhodamine labeled) immobilized on a PEG coated coverslip and a non-biotinylated  
542 microtubule ('moving MT', X-rhodamine-labeled) are crosslinked in an antiparallel  
543 orientation by PRC1 (purple). Microtubule sliding and end-tag formation are initiated by  
544 addition of Kif4A-GFP (green), PRC1 and ATP.



545 **(B-D)** Representative time-lapse fluorescence micrographs of relative microtubule  
546 sliding in experiments with 0.2 nM PRC1 and 6 nM Kif4A-GFP. Images show (B) a pair  
547 of X-rhodamine-labeled microtubules, (C) Kif4A-GFP, and (D) overlay images (red,  
548 microtubules; green, Kif4A-GFP). The schematic in (B) illustrates the position and  
549 relative orientation of both the immobilized (pink) and moving (red) microtubules and the  
550 end-tags (green) at the beginning and end of the time sequence. Scale bar: x: 2  $\mu$ m and  
551 y: 1 min.

552 **(E)** Line scan analysis of the Kif4A intensity from the micrographs in (C) show the  
553 distribution of Kif4A within the overlap at the indicated time points.

554 **(F-H)** Kymographs show the relative sliding and stalling of antiparallel microtubules (F),  
555 associated Kif4A-GFP (G) and the overlay image (red, microtubules; green, Kif4A-GFP)  
556 (H). Assay condition: 0.2 nM PRC1 and 6 nM Kif4A-GFP. Scale bar: x: 2  $\mu$ m and y: 1  
557 min.

558 **(I-K)** Kymographs show the relative sliding and stalling of antiparallel microtubules (I),  
559 associated GFP-PRC1 (J) and the overlay image (red, microtubules; green, GFP-  
560 PRC1) (K). Assay condition: 0.5 nM GFP-PRC1 and 6 nM Kif4A. Scale bar: x: 2  $\mu$ m and  
561 y: 1 min.

562

## 563 **Fig. 2. Quantitative analysis of microtubule sliding in the PRC1-Kif4A system**

564 **(A)** Schematic of a pair of crosslinked microtubules showing the parameters described  
565 in Figs. 2 and 3.

566 **(B)** Kymograph shows the relative sliding and stalling in a pair of antiparallel  
567 microtubules (red) and associated Kif4A-GFP (green). Assay condition: 0.2 nM PRC1  
568 and 6 nM Kif4A-GFP. Scale bar: 2  $\mu$ m. The schematic illustrates the position and  
569 relative orientation of both the immobilized (pink) and moving (red) microtubules and the  
570 end-tags (green) at the beginning and end of the time sequence.

571 **(C)** Time record of the instantaneous sliding velocity of the moving microtubule derived  
572 from the kymograph in (B). The dashed lines demarcate the three phases observed in  
573 the sliding velocity profile: (1) constant phase, (2) slow down and (3) stalling.

574 **(D)** Bar graph of the average sliding velocity calculated from the constant velocity  
575 movement in phase-1. Assay conditions: (i) 0.2 nM and 6 nM Kif4A-GFP (mean:  $60 \pm$

576 17; N=98) (ii) 1 nM PRC1 and 6 nM Kif4A-GFP (mean:  $15 \pm 8$ ; N=45). Error bars  
577 represent the standard deviation of the data.

578 **(E)** Histograms of the initial GFP-fluorescence density in the untagged region of the  
579 overlap,  $\rho_{\text{untagged}}$ . Assay conditions: (i) 0.2 nM PRC1 and 6 nM Kif4A-GFP (black;  
580 mean:  $3.7 \pm 1.7$  A.U./nm; N=64) and (ii) 1 nM PRC1 and 6 nM Kif4A-GFP (red; mean:  
581  $6.5 \pm 1.9$  A.U./nm; N=33). The mean and error values were obtained by fitting the  
582 histograms to a Gaussian distribution.

583

584 **Fig. 3: Microtubule sliding velocity in the PRC1-Kif4A system scales with initial**  
585 **overlap width.**

586 **(A-B)** Binned plots of initial sliding velocity versus the initial overlap length. The initial  
587 overlap length between the moving MT and immobilized MT is calculated from the  
588 rhodamine MT channel. Sliding velocity is calculated from the constant velocity  
589 movement in phase-1. (A) Assay conditions: (i) 0.2 nM PRC1 and 6 nM Kif4A-GFP  
590 (black; N=60; Pearson's correlation coefficient=0.54) and (ii) 1 nM PRC1 and 6 nM  
591 Kif4A-GFP (red; N=42; Pearson's correlation coefficient=0.03). (B) Assay conditions: (i)  
592 0.5 nM GFP-PRC1 and 6 nM Kif4A (red; N=25; Pearson's correlation coefficient=0.69)  
593 and (ii) 1 nM GFP-PRC1 and 12 nM Kif4A (blue; N=20; Pearson's correlation  
594 coefficient=0.74).

595 **(C-D)** Scatter plot of the average sliding velocity versus the initial overlap length color-  
596 coded by moving microtubule length,  $L_{\text{MT}}$ . (C) Assay condition: 0.2 nM PRC1 and 6 nM  
597 Kif4A-GFP (green:  $L_{\text{MT}} = 2 \pm 0.5$   $\mu\text{M}$ , red:  $L_{\text{MT}} = 4 \pm 0.5$   $\mu\text{M}$ , blue:  $L_{\text{MT}} = 6 \pm 0.5$   $\mu\text{M}$ ;  
598 N=60). (D) Assay condition: 0.5 nM GFP-PRC1 and 6 nM Kif4A (green:  $L_{\text{MT}} = 1 \pm 0.5$   
599  $\mu\text{M}$ , red:  $L_{\text{MT}} = 2 \pm 0.5$   $\mu\text{M}$ , blue:  $L_{\text{MT}} = 3 \pm 0.5$   $\mu\text{M}$ ; N=25).

600 **(E)** Kymograph shows the relative sliding and stalling in a pair of antiparallel  
601 microtubules (red) and associated Kif4A-GFP (green). Assay condition: 0.2 nM PRC1  
602 and 6 nM Kif4A-GFP. Scale bar: 2  $\mu\text{m}$ . The schematic illustrates the position and  
603 relative orientation of both the immobilized (pink) and moving (red) microtubules and the  
604 end-tags (green) at the beginning and end of the time sequence.

605 **(F)** Time record of the instantaneous sliding velocity of the moving microtubule derived  
606 from the kymograph in (E). The dashed lines demarcate the three phases observed in  
607 the sliding velocity profile: (1) constant phase, (2) slow down and (3) stalling.

608 **(G)** Time record of the overlap length (red;  $L_{overlap}$ ) derived from the kymograph in (E).

609 **(H)** Time record of the total fluorescence intensity in the antiparallel overlap (dashed  
610 gray;  $I_{overlap}$ ), fluorescence intensity in the untagged region of the overlap (solid purple;  
611  $I_{untagged}$ ), and fluorescence density (intensity per unit overlap length) in the untagged  
612 region of the overlap (solid green;  $\rho_{untagged}$ ) derived from the kymograph in (E).

613

614 **Fig. 4. The width of the final antiparallel overlap established by PRC1 and Kif4A is**  
615 **determined by end-tag and microtubule lengths.**

616 **(A)** Schematic shows the formation of a stable antiparallel overlap upon collision of the  
617 two end-tags and the stalling of relative microtubule sliding. The initial overlap length is  
618 the overlap length of the moving MT on the immobilized MT at  $t=0$ .  $L_{ET1}$  and  $L_{ET2}$  are  
619 the lengths of the end-tags consisting Kif4A and PRC1 on the plus-end of each MT. The  
620 moving MT with length  $M_{L2}$  moves relative to the immobilized MT with length  $M_{L1}$ , at  
621 velocity= $v$ . The collision and the stalling of the end-tags form a stable overlap, which is  
622 the final overlap length at  $v=0$ .

623 **(B)** Histograms of the ratio of sum of the end-tag lengths ( $L_{ET1} + L_{ET2}$ ) and final overlap  
624 length  $L_{FO}$ . Assay conditions: (i) 0.2 nM PRC1 and 6 nM Kif4A-GFP (black; N=51) and  
625 (ii) 1 nM PRC1 and 6 nM Kif4A-GFP (red; N=33).

626 **(C-E)** Plots of the final overlap length ( $L_{FO}$ ) versus (C) the immobilized microtubule  
627 length ( $M_{L1}$ ), (D) moving microtubule length ( $M_{L2}$ ), and (E) and the sum of microtubule  
628 lengths ( $M_{L1} + M_{L2}$ ). Assay conditions: (i) 0.2 nM PRC1 and 6 nM Kif4A-GFP (black;  
629 N=75) and (ii) 1 nM PRC1 and 6 nM Kif4A-GFP (red; N=30). The Pearson's correlation  
630 coefficient for (E) is (i) 0.65 and (ii) 0.62.

631

632 **Fig. 5. Examination of the mechanisms that ensure stability of the overlaps**  
633 **established by PRC1 and Kif4A.**



634 **(A)** Schematic of the ADP and ATP wash-in experiments performed with stalled  
635 microtubule overlaps (Figs. 5B-E).

636 **(B-E)** The following figures are representative dual-channel fluorescence micrographs  
637 showing microtubules (red) and associated GFP-PRC1 (green) under different  
638 experimental conditions.

639 **(B-C)** Time-lapse images (B) and corresponding line-scan profiles (C) of Kif4A-GFP  
640 fluorescence of a microtubule pair established as in (B) and subsequent exchange into  
641 a buffer containing 2 mM ADP.

642 **(D-E)** Time-lapse images (D) and corresponding line-scan profiles (E) of Kif4A-GFP  
643 fluorescence of the microtubule pair in (B) after flowing in 1 mM ATP into the chamber.

644  
645 **Fig. 6. Antiparallel array composed of multiple microtubules are aligned at**  
646 **microtubule plus-ends formed by PRC1 and Kif4A**

647 **(A-C)** Kymographs show the relative sliding of two microtubules relative to an  
648 immobilized microtubule (A), associated Kif4A-GFP (B) and the overlay image (red,  
649 microtubules; green, Kif4A-GFP) (C). Both moving microtubules stall at the plus-end of  
650 the immobilized microtubule. Assay condition: 0.2 nM PRC1 and 6 nM Kif4A-GFP.  
651 Scale bar: x: 2  $\mu$ m and y: 1 min.

652 **(D-F)** Kymographs show the relative sliding of three microtubules relative to an  
653 immobilized microtubule (D), associated GFP-PRC1 (E) and the overlay image (red,  
654 microtubules; green, GFP-PRC1 (F). All three moving microtubules stall at the plus-end  
655 of the immobilized microtubule. Assay condition: 1 nM GFP-PRC1 and 6 nM Kif4A.  
656 Scale bar: x: 2  $\mu$ m and y: 1 min.

657  
658 **Fig. 7. Model for the length-dependent sliding by the collective activity of PRC1**  
659 **and Kif4A.**

660 Schematic shows a simple model for initial microtubule sliding and subsequent stalling  
661 of overlapping antiparallel microtubules established by PRC1 and Kif4A when the end-  
662 tags arrive at close proximity. At the initial state,  $t = 0$ , the 'immobilized' and 'moving'  
663 microtubules are crosslinked by PRC1 to form an antiparallel overlap. At  $t > 0$ , Kif4A  
664 molecules are introduced into the solution, which form a complex with PRC1. This

665 initiates the formation of PRC1-Kif4A end-tags at the plus-ends of both microtubules as  
666 well as relative sliding of the moving microtubule. Microtubules that form shorter initial  
667 overlaps slide with lower velocity than microtubule pairs that form longer initial overlaps.  
668 A stable overlap is established when end-tags arrive at close proximity. Since the size  
669 of PRC-Kif4A end-tags scale with microtubule length, shorter microtubules form a short  
670 overlap and the longer microtubules form a longer overlap.

## Figures

**Fig. 1**

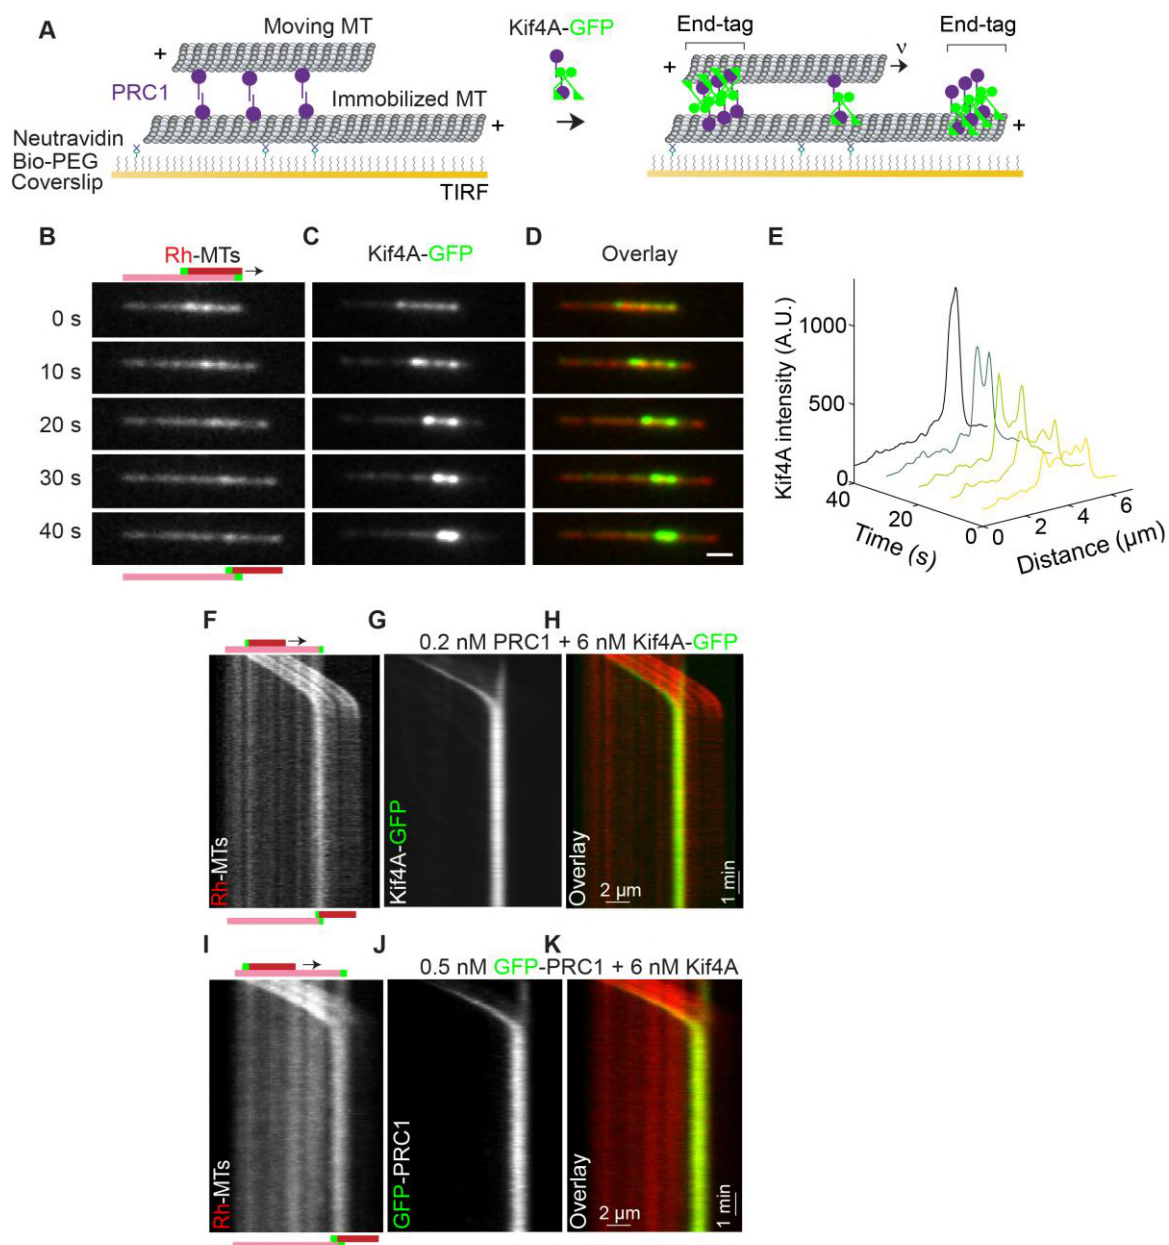

**Fig. 2**

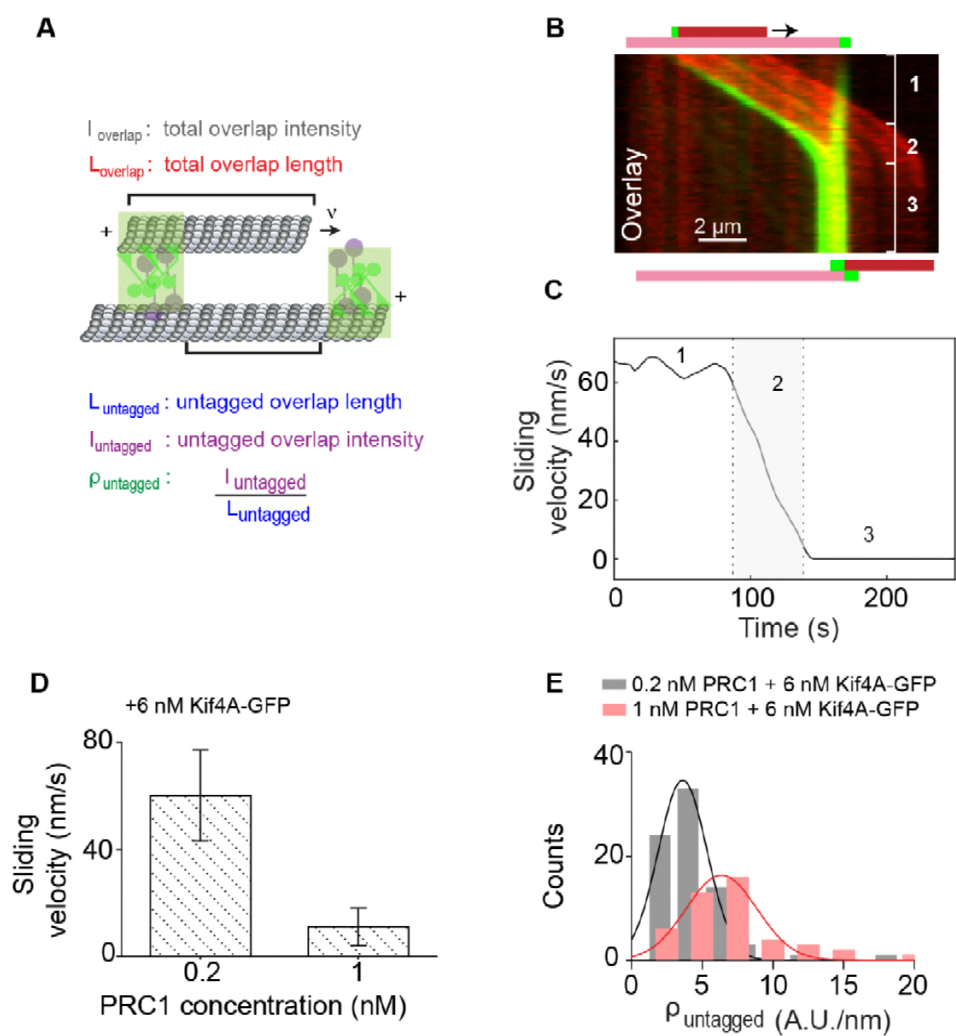

**Fig. 3**

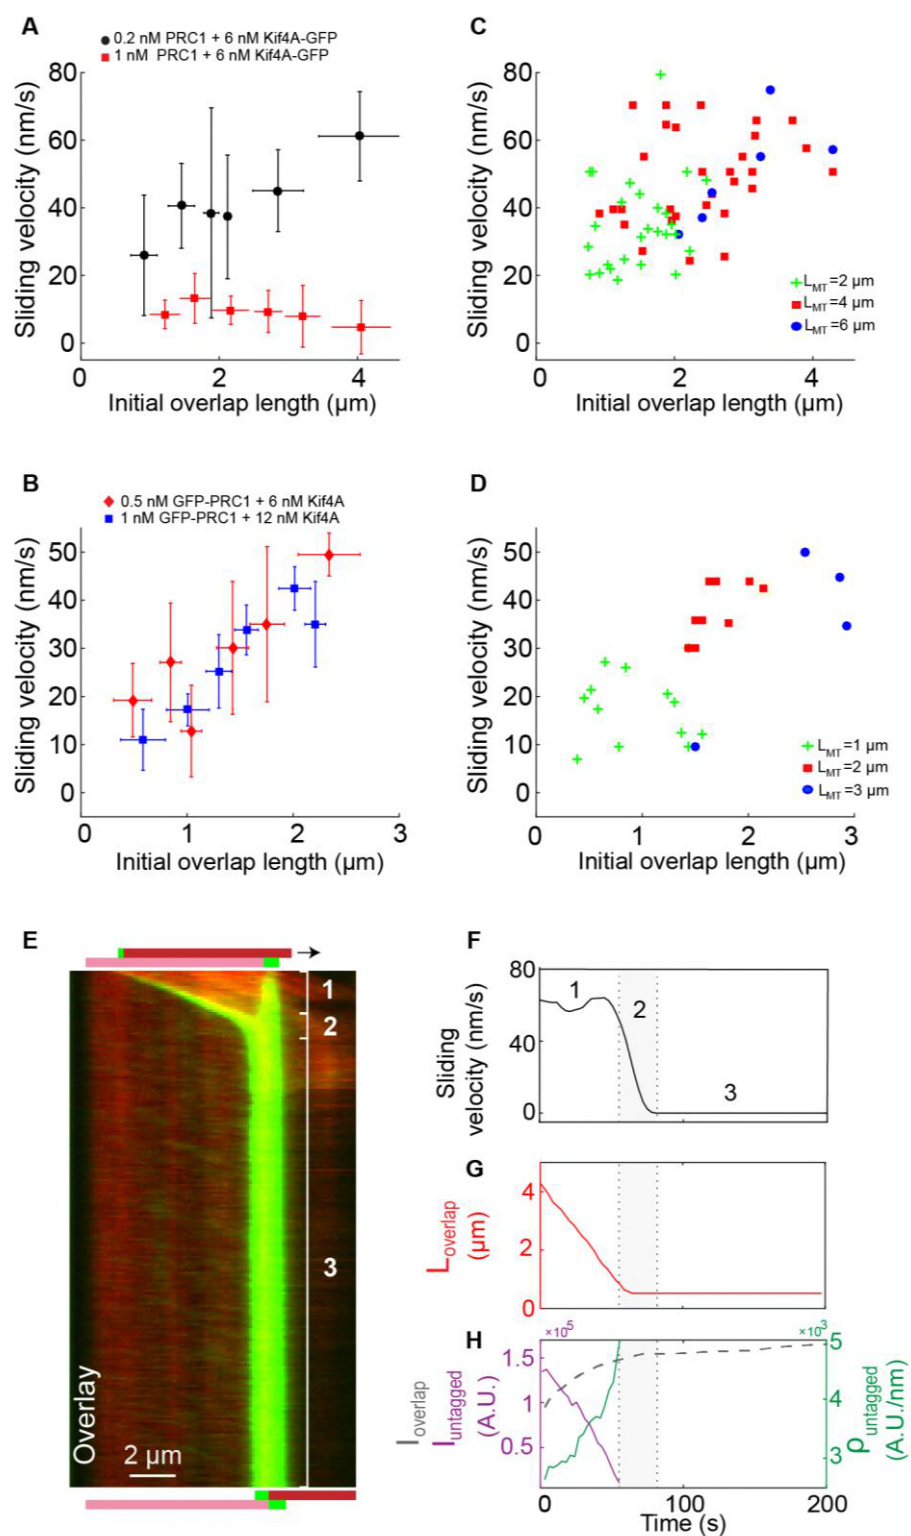

**Fig. 4**

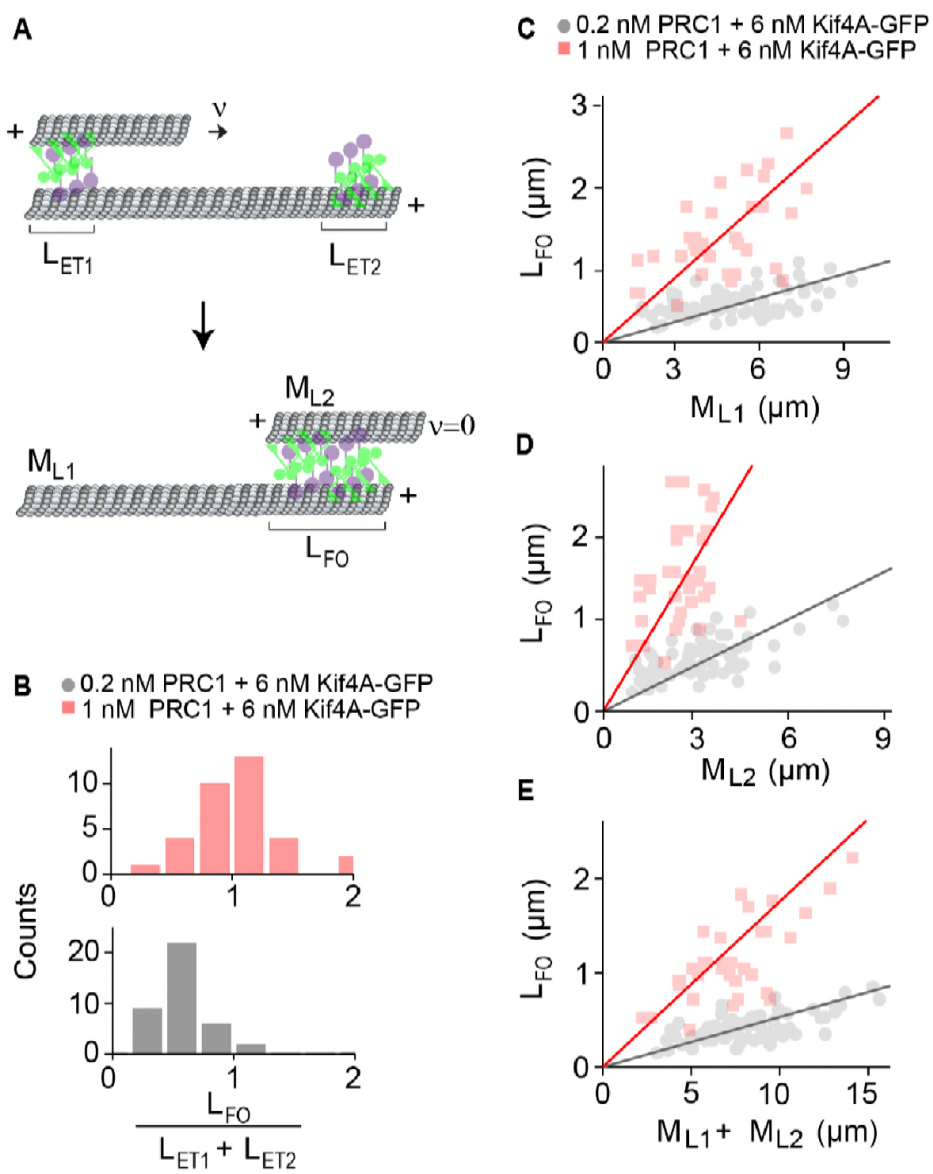



**Fig. 5**

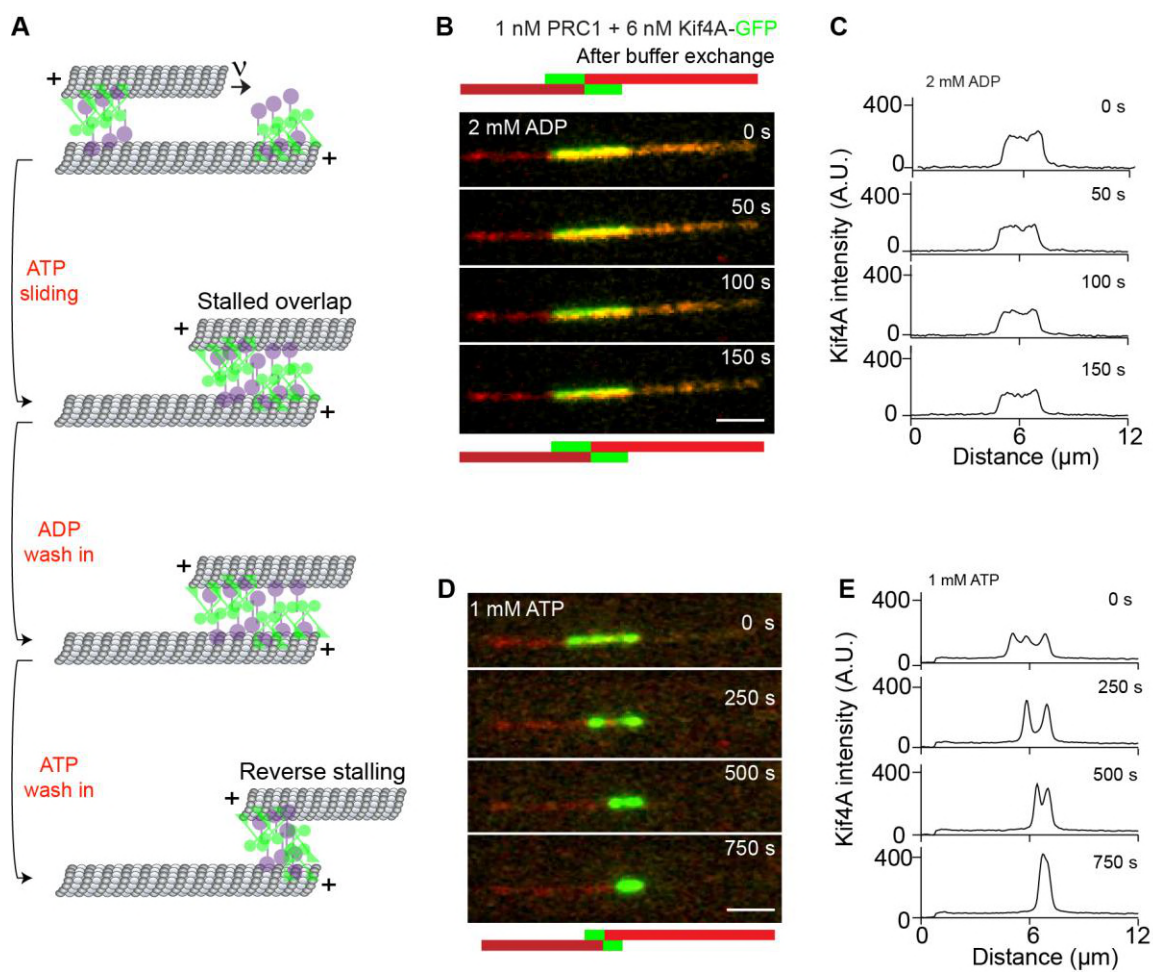

**Fig. 6**

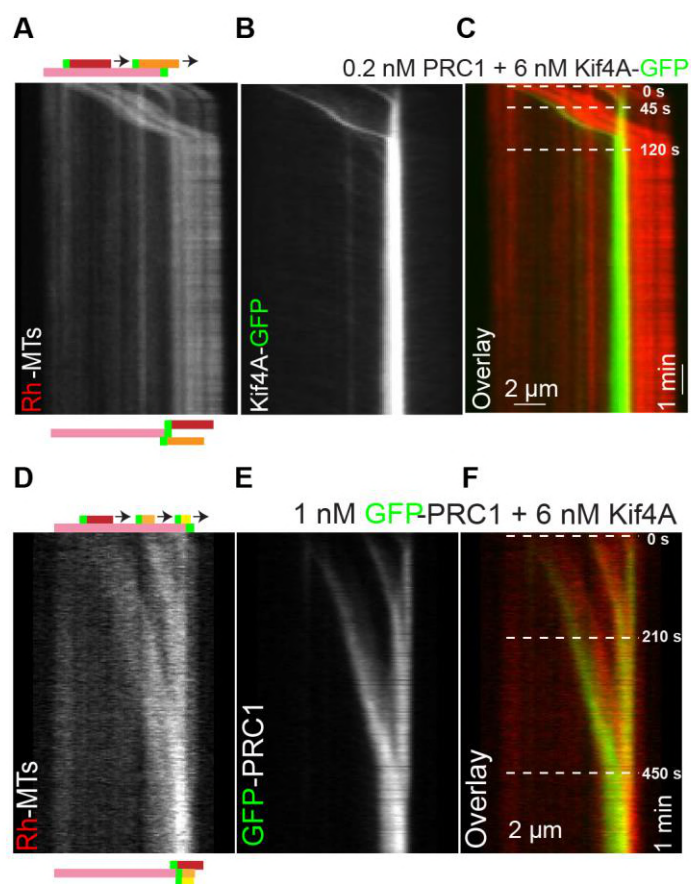



**Fig. 7**

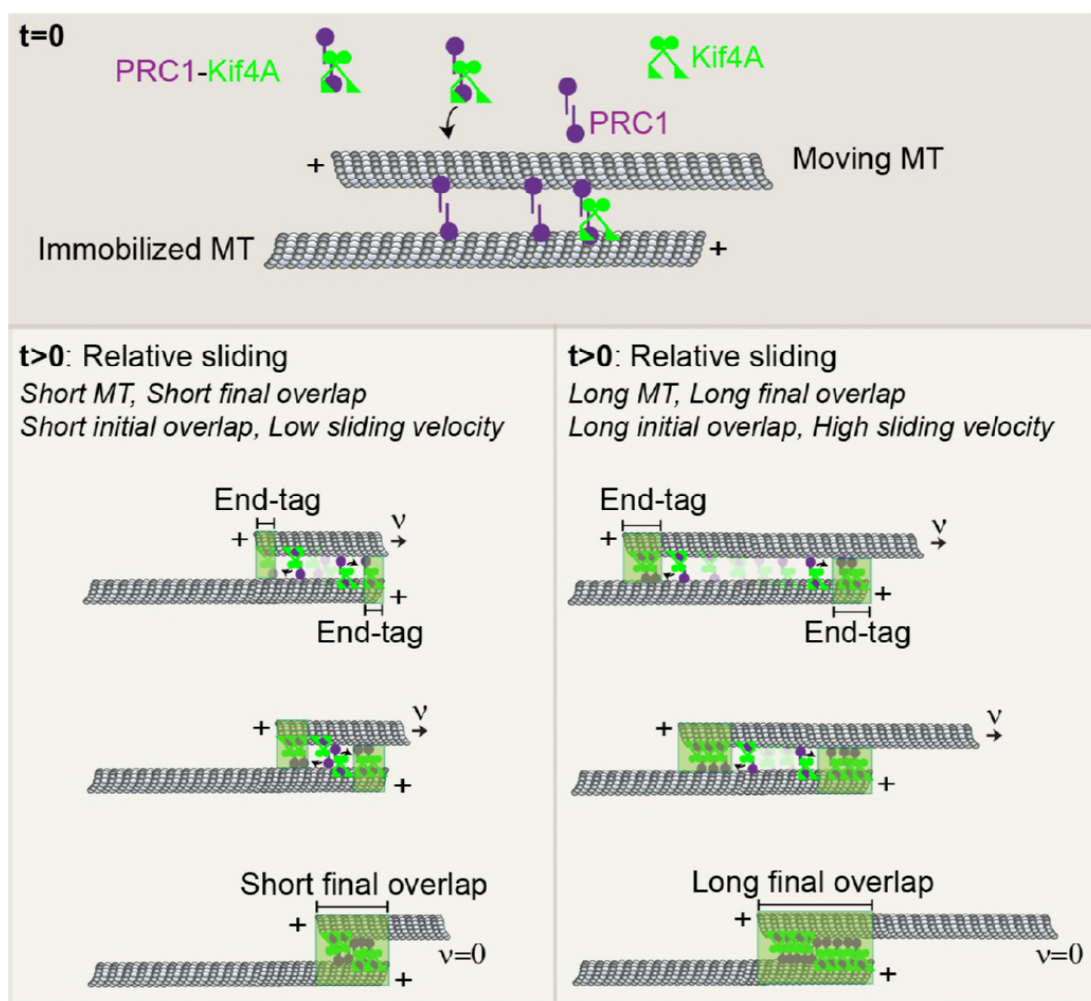

## 671 Appendix

### 672 1. Theoretical description of the scaling of microtubule sliding 673 velocity with initial overlap length

674 We propose a simple model consistent with our experimental observations that the  
675 microtubule sliding velocity in the PRC-Kif4A system depends on the initial antiparallel overlap  
676 length (Figs. 3A-B). The central feature of this model is that sliding is mediated by PRC1-Kif4A  
677 molecules that can diffuse along one microtubule and step along the other. As shown in the  
678 schematic in Appendix Fig. 1A, the non-motor crosslinker PRC1 (purple) diffuses one-  
679 dimensionally along the microtubule and the motor kinesin molecule (green) steps along the  
680 lattice to the plus-end of the microtubule. This will result in a reduction in the coupling between  
681 kinesin stepping and translocation of the moving microtubule. Therefore, the net sliding velocity  
682 is lower than the velocity of Kif4A stepping on single microtubules (Appendix Fig. 1A). This  
683 configuration is conceptually similar to the sliding of microtubules by lipid membrane-anchored  
684 kinesins [1]. Therefore we adapt the theoretical framework developed by *Grover et al.* to  
685 examine the dependence of microtubule sliding velocity by PRC1-Kif4A complexes on initial  
686 overlap length of the array [1].

687 For this system, we define: the stepping velocity of the motor as  $v_{step}$ , which propels the  
688 microtubule with  $v_{MT}$  and  $v_{slip}$  as the net ‘slipping rate’ of the PRC1-Kif4A on the microtubule  
689 due to PRC1 diffusion and other potential factors such as force dependent dissociation of PRC1  
690 and Kif4A, thus

$$691 \quad v_{slip} = v_{step} - v_{MT}. \quad (1)$$

692 Next, for simplicity, it is assumed that the microtubule-PRC1-Kif4A complex is at equilibrium  
 693 force. Therefore, the net force acting on the system is zero. The force balance equation  
 694 becomes

$$695 \quad n \cdot F_{kin+PRC1} + F_{MT} = 0 \quad (2)$$

696 where  $n$  is the number of molecules in the overlap,  $F_{kin+PRC1}$  is the net frictional force acting on  
 697 the kinesin due to diffusion of PRC1 molecules on microtubules, and  $F_{MT}$ , is the external force  
 698 acting on the microtubule due to hydrodynamic drag of the solution.

699 The frictional force on a PRC1 molecule that is dragged by a kinesin motor with velocity  
 700 is  $F_{kin+PRC1} = \gamma v_{slip}$ , where  $\gamma = \frac{k_B F}{D_{PRC1}}$  where  $D_{PRC1} = 0.29 \times 10^4 \text{ nm}^2/\text{s}$  for PRC1 molecules in a  
 701 densely-decorated microtubule overlap [1].

702 The frictional force on a moving microtubule,  $F_{MT} = \gamma_{MT} v_{MT}$  where  $v_{MT}$  is the velocity of  
 703 the microtubule,  $\gamma_{MT} = \frac{2\pi\eta L_{MT}}{\ln\left(\frac{2h}{r_{MT}}\right)}$  is the drag coefficient for a cylindrical object moving parallel to the  
 704 surface,  $\eta$  is the viscosity of water,  $L_{MT}$  is the length of the microtubule,  $h$  is the height of the  
 705 microtubule, and  $r_{MT}$  is the radius of the microtubule.

706 Because microtubule has 13 protofilaments, the molecules between two microtubules  
 707 can theoretically bind to more than one protofilament. For this reason, the maximum number of  
 708 molecules  $n$  in an overlap  $l$  can be written as  $n = d \frac{l}{\delta}$  where  $d$  is the number of protofilaments  
 709 and the length of a single site,  $\delta = 8 \text{ nm}$ . If the fractional occupancy is  $a$ , then we can rewrite Eq.  
 710 2 as:

$$711 \quad a \cdot d \frac{l}{\delta} \cdot F_{kin+PRC1} + F_{MT} = 0 \quad (3)$$

712 where  $a$  is the fractional occupancy.

713 Plugging in the  $F_{MT}$  and  $F_{kin+PRC1}$ , Eq. 3 becomes,

$$714 \quad \alpha \cdot d \frac{l}{\delta} \frac{k_B T}{D_{PRC1}} v_{slip} + \frac{2\pi\eta L_{MT}}{\ln\left(\frac{2h}{r_{MT}}\right)} v_{MT} = 0$$

$$715 \quad v_{MT} = -\frac{\alpha \cdot d \frac{l}{\delta} k_B T v_{slip}}{D_{PRC1}} / \frac{2\pi\eta L_{MT}}{\ln\left(\frac{2h}{r_{MT}}\right)}. \quad (4)$$

716 Substituting equation (1) in (4), we yield

$$717 \quad v_{MT} = -\frac{1}{1 + \frac{f L_{MT}}{\alpha d \frac{l}{\delta}}} \cdot v_{step} \quad \text{where } f = \frac{2\pi\eta D_{PRC1}}{\ln\left(\frac{2h}{r_{MT}}\right) k_B T}.$$

718 Using previously published parameters (Table A1), we examined which factors are likely  
 719 to dictate the dependence of initial overlap length on sliding velocity. We find that the theoretical  
 720 model predicts that the sliding velocity as a function of overlap depends weakly on the moving  
 721 microtubule length (Appendix Fig. 1B) and the (ii) fractional occupancy of the molecules  
 722 (Appendix Fig. 1C), but depends strongly on the: (i) the diffusion constant (Appendix Fig. 1D)  
 723 and (ii) the number of protofilaments that are available for cross-bridging (Appendix Fig. 1E).  
 724 Consistent with these trends, in our analysis of the experimental data (Fig. 3), we observed a  
 725 stronger dependence of sliding velocity on initial overlap length at higher Kif4A-PRC1 ratios  
 726 where we would expect a greater percent of complexes in the overlap contributing to sliding.

727

728 **Table A1:** Parameter values

| <b>Symbol</b>     | <b>Parameter</b>                             | <b>Value</b>                          | <b>Reference</b> |
|-------------------|----------------------------------------------|---------------------------------------|------------------|
| $l$               | Initial overlap length                       | 0-2 $\mu\text{m}$                     | Chosen           |
| $d$               | Number of protofilaments                     | 1-13                                  | Chosen           |
| $\delta$          | Length of a $\alpha$ - $\beta$ tubulin dimer | 8 nm                                  | [2]              |
| $k_B$             | Boltzmann's constant                         | $1.38 \times 10^{-23}$ J/K            | [3]              |
| $T$               | Temperature                                  | 295 K                                 | [1]              |
| $D_{\text{PRC1}}$ | Diffusion constant of PRC1                   | $0.29 \times 10^4$ nm <sup>2</sup> /s | [4]              |
| $\eta$            | Viscosity of water                           | $10^{-3}$ Pa·s                        | [5]              |
| $L_{\text{MT}}$   | Length of moving microtubule                 | 2-10 $\mu\text{m}$                    | Chosen           |
| $h$               | Height of microtubule                        | 50 nm                                 | [2]              |
| $r_{\text{MT}}$   | Radius of microtubule                        | 12.5 nm                               | [2]              |
| $v_{\text{step}}$ | Stepping velocity of kinesin                 | 300 nm/s                              | [6]              |

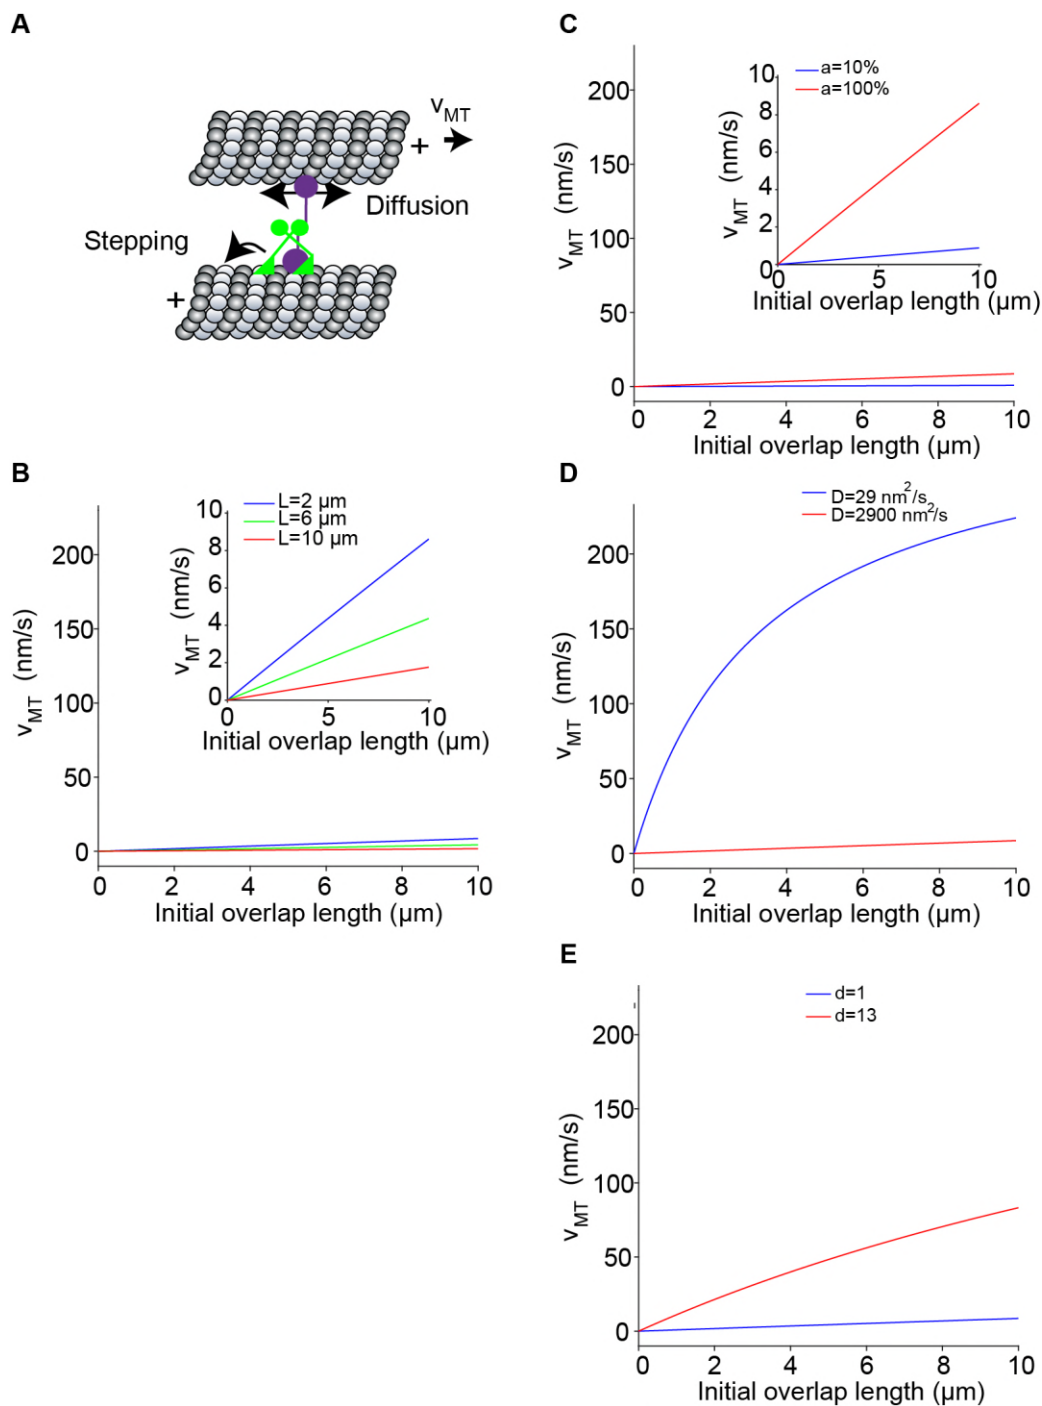

729 **Appendix Figure 1.** Theoretical model of the scaling of microtubule sliding with the initial  
 730 overlap length. **(A)** Schematic shows a simple model of microtubule sliding driven by a  
 731 microtubule anchored motor-non-motor complex. The non-motor PRC1 molecule (purple)  
 732 diffuses one-dimensionally along the microtubule and the kinesin molecule (green) drags the  
 733 PRC1 molecule and steps along the lattice, which results microtubule sliding with velocity  $V_{MT}$ .  
 734 **(B-E)** Plot of the sliding velocity as a function of initial overlap length color-coded by (B) moving

735 microtubule lengths (blue: 2  $\mu\text{m}$ ; green: 6  $\mu\text{m}$ ; red: 10  $\mu\text{m}$ ), (C) fractional occupancy,  $\alpha$  (blue:  
736 10%; red: 100%), (D) diffusion constant,  $D$ , (blue: 29  $\text{nm}^2/\text{s}$ ; red: 2900  $\text{nm}^2/\text{s}$ ), and (E) number  
737 of protofilaments available for crosslinking and stepping,  $d$ .

## 738 2. Appendix References

1. Grover, R., J. Fischer, F.W. Schwarz, W.J. Walter, P. Schwille, and S. Diez, *Transport efficiency of membrane-anchored kinesin-1 motors depends on motor density and diffusivity*. Proc Natl Acad Sci U S A, 2016. **113**(46): p. E7185-E7193.
2. Hunt, A.J., F. Gittes, and J. Howard, *The force exerted by a single kinesin molecule against a viscous load*. Biophys J, 1994. **67**(2): p. 766-81.
3. Mohr, P.J., D.B. Newell, and B.N. Taylor, *CODATA recommended values of the fundamental physical constants: 2014*. Journal of Physical and Chemical Reference Data. **45**(4): p. 043102.
4. Bieling, P., I.A. Telley, and T. Surrey, *A minimal midzone protein module controls formation and length of antiparallel microtubule overlaps*. Cell, 2010. **142**(3): p. 420-32.
5. Gupta, S.V., *Viscometry for liquids : calibration of viscometers*. Springer Series in Materials Science,. 2014. 1 online resource (xv, 256 pages).
6. Subramanian, R., S.C. Ti, L. Tan, S.A. Darst, and T.M. Kapoor, *Marking and measuring single microtubules by PRC1 and kinesin-4*. Cell, 2013. **154**(2): p. 377-90.
